# Supplementary material for: A transfer learning protocol for chemical catalysis using a recurrent neural network adapted from natural language processing
Source: Royal Society of Chemistry journal article supplement (doi:10.1039/d1dd00052g), 2022-01-01
Supplement: d1dd00052g1.pdf [file d1dd00052g1.pdf]

Electronic Supplementary Information

**A Transfer Learning Protocol for Chemical Catalysis using Recurrent Neural Network**

**Adapted from Natural Language Processing**

Sukriti Singh<sup>a,\*</sup> and Raghavan B. Sunoj<sup>a,b,\*</sup>

<sup>a</sup> Department of Chemistry, Indian Institute of Technology Bombay, Mumbai 400076, India

and <sup>b</sup> Centre for Machine Intelligence and Data Science, Indian Institute of Technology Bombay,  
Mumbai 400076, India

|     | Table of Contents                                                                                  | Page |
|-----|----------------------------------------------------------------------------------------------------|------|
| 1.  | Overview of ULMFiT                                                                                 | S4   |
|     | 1.1 Training the language model (LM)                                                               | S4   |
|     | 1.2 Training the target-task regressor                                                             | S6   |
| 2.  | Various techniques used for fine-tuning                                                            | S8   |
|     | 2.1 Discriminative learning rates for pre-trained models                                           | S8   |
|     | 2.2 Fit-one-cycle                                                                                  | S9   |
|     | 2.3 Gradual unfreezing                                                                             | S9   |
| 3.  | Dataset preparation                                                                                | S10  |
|     | 3.1 SMILES augmentation                                                                            | S12  |
|     | 3.2 Test time augmentation (TTA)                                                                   | S13  |
| 4.  | Programming details                                                                                | S14  |
| 5.  | <b>Pd-catalyzed Buchwald-Hartwig reaction (Reaction-1)</b>                                         | S14  |
|     | 5.1 Summary of reactions                                                                           | S14  |
|     | 5.2 Target-task LM fine-tuning                                                                     | S15  |
|     | 5.3 Target-task regressor fine-tuning                                                              | S17  |
|     | 5.4 Training the target-task regressor from scratch                                                | S20  |
|     | 5.5 Y-randomization                                                                                | S23  |
|     | 5.6 Out-of-bag performance                                                                         | S23  |
|     | 5.7 Reaction SMILES for prediction                                                                 | S24  |
|     | 5.8 Target-task regressor fine-tuning without gradual unfreezing and with a constant learning rate | S25  |
| 6.  | <b>Enantioselective formation of N,S-acetals (Reaction-2)</b>                                      | S28  |
|     | 6.1 Summary of reactions                                                                           | S28  |
|     | 6.2 Target-task LM fine-tuning                                                                     | S32  |
|     | 6.3 Target-task regressor fine-tuning                                                              | S34  |
|     | 6.4 Training the target-task regressor from scratch                                                | S37  |
|     | 6.5 Y-randomization                                                                                | S39  |
|     | 6.6 Target-task regressor fine-tuning without gradual unfreezing and with a constant learning rate | S39  |
| 7.  | <b>Asymmetric hydrogenation of alkenes and imines (Reaction-3)</b>                                 | S41  |
|     | 7.1 Summary of reactions                                                                           | S41  |
|     | 7.2 Target-task LM fine-tuning                                                                     | S49  |
|     | 7.3 Target-task regressor fine-tuning                                                              | S51  |
|     | 7.4 Training the target-task regressor from scratch                                                | S54  |
|     | 7.5 Y-randomization                                                                                | S56  |
|     | 7.6 Target-task regressor fine-tuning without gradual unfreezing and with a constant learning rate | S57  |
|     | 7.7 Importance of composite reaction representation                                                | S59  |
| 8.  | Data augmentation                                                                                  | S60  |
| 9.  | Time economy                                                                                       | S60  |
| 10. | Analysis of encoder output                                                                         | S62  |
|     | 10.1 Reaction-1                                                                                    | S62  |
|     | 10.2 Reaction-2                                                                                    | S64  |
|     | 10.3 Reaction-3                                                                                    | S66  |

|     |                                                                                                    |     |
|-----|----------------------------------------------------------------------------------------------------|-----|
| 11. | Comparison of performance of target-task regressor fine-tuning with and without gradual unfreezing | S67 |
| 12. | Hyperparameter optimization procedure                                                              | S68 |
| 13. | Performance comparison for reactions 2 and 3                                                       | S69 |
| 14. | Out-of-sample predictions for reactions 1 and 2                                                    | S73 |
| 15. | Comparison of model using paired t-test                                                            | S73 |
| 16. | References                                                                                         | S74 |

## 1. Overview of ULMFiT

ULMFiT consists of key three steps as shown in Fig. S1. Additional details of each of these three steps with the respective model architecture are provided in the following sections.

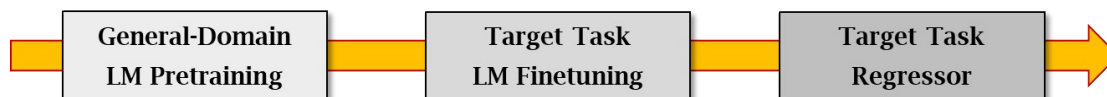

**Fig. S1.** The steps involved in ULMFiT.

### 1.1 Training the language model (LM)

#### 1.1.1 Model architecture

A brief overview of the model architecture used in the training of the LM is given in Fig. S2. For training, a regular LSTM with inbuilt optimization and regularization capabilities such as in the AWD-LSTM model architecture, is implemented.<sup>1</sup> This architecture involves an embedding layer, an encoder with three LSTM layers within, and a decoder layer. The embedding layer transforms the numericalized tokens (as shown in Fig. 2 in the main text) into real-valued vectors of fixed length. With an embedding size of 400 (a standard size, used in ULMFiT), each character in the SMILES string is represented by a 400-dimensional vector space. These vectors are initialized in the embedding layer and get updated during the training of the network. The embedding vectors contain the semantic relationship among the characters of the SMILES string. The output from the embedding layer, with a size of 400, is received as the input in the first of the 3 LSTM layers of the encoder consisting of 1152 hidden activations in each layer. The second LSTM layer then takes the hidden state of the previous layer, with a size of 1152, as its input. The output of the last layer of the encoder provides a hidden state of size 400, same as the embedded input. The output hidden state of the final LSTM layer is then decoded by a fully connected linear layer. Finally, a softmax function is applied which assigns the probability for every token in the vocabulary to be the next token.

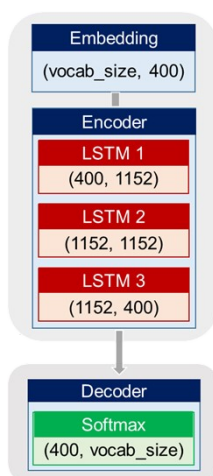

**Fig. S2.** The network architecture used for the training the language model using a 400-dimensional vector space generated from the SMILES strings of molecules.

**1.1.2 General-domain LM pre-training:** In the first step, the LM is pre-trained on a large dataset through which the model acquires the ability to predict the next character in a SMILES string. The pre-training step assists the model in understanding the inherent connectivity in molecules including grammar and semantics present in SMILES, which is beneficial for the downstream tasks.<sup>2</sup> Although this step is expensive, it needs to be done only once as it can be reused for other tasks. In the present study, the general-domain LM is trained on one million molecules as collected from the ChEMBL database, thus utilizing the vast amount of unlabeled chemical data for pre-training.<sup>3</sup> SMILES augmentation is also used while training wherein each molecule is augmented with four additional SMILES strings (Fig. S8).

**1.1.3 Target-task LM fine-tuning:** While the general-domain dataset used in the pre-training can span a large and diverse regions of the chemical space of interest, it is quite likely that the target task belongs to a different distribution. In keeping with the spirit of transfer learning, the knowledge gained from the pre-training step should be utilized for the target task. Thus, the target-task LM is fine-tuned using the pre-trained weights from the previous step (Fig. S3). Akin to that in the pre-training step, the model learns to predict the next character in a SMILES string,

but at this stage, the model would have learned the task-specific features as well. With the pre-trained model, the fine-tuning step converges faster as it only has to adapt to the characteristics of the target task data. At this stage, the LM has learned the task-specific features and is ready for the regression task with some adjustments in the architecture (Section 1.2.1).

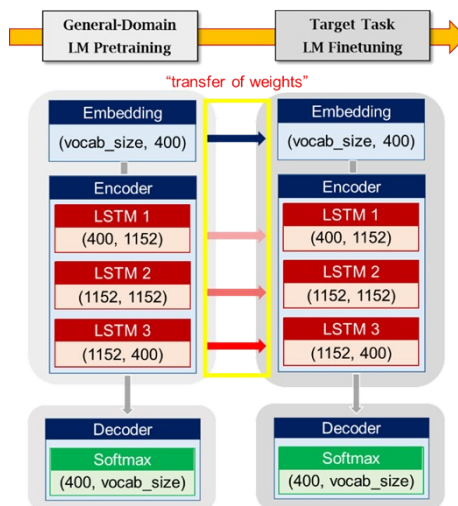

**Fig. S3.** Target-task LM fine-tuning that uses the pre-trained weights from the general-domain LM pre-training

## 1.2 Training the target-task regressor

### 1.2.1 Model architecture

For training a regressor, the LM architecture is slightly adjusted in the downstream (i.e., after the final LSTM layer) by adding two linear blocks with the ReLU activation function for the first linear layer, as shown in Fig. S4. Since the input sentences can contain several characters, the chance of losing some of the relevant information might be high if only the last hidden state is considered. To address this, we used the concat pooling technique by concatenating the last hidden state with both max-pooled and mean-pooled representations of all the hidden states (each of size 400) in the third LSTM layer. Such concatenation yields a feature vector of size 1200 for each character, which is then passed to a feed forward neural network serving as the linear decoder. Here, the first linear layer in the decoder has 50 activations, thereby reducing the

size of the longer concatenated input feature vector to 50. It then serves as the input to the final linear layer where the dimension is further reduced to 1 for the regression task (as shown in Fig. 2 in the main text).

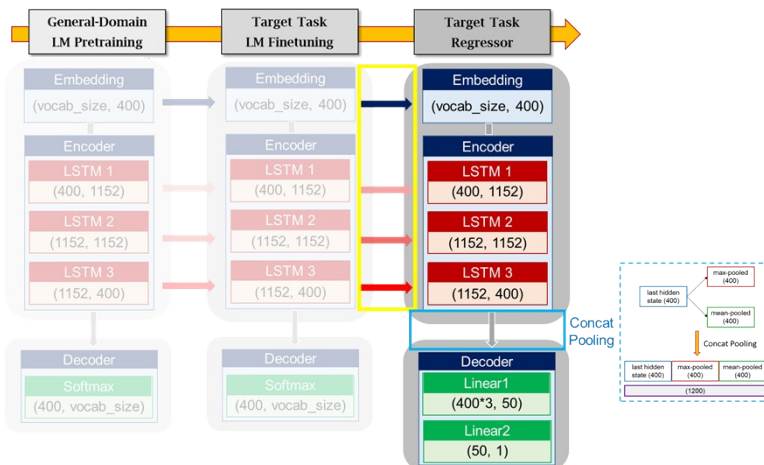

**Fig. S4.** Target-task regressor fine-tuning with concat pooling to make it conducive for the desired regression.

### 1.2.2 Target-task regressor fine-tuning

In the final stage, the actual target task activity, i.e., the prediction of % of *ee* or yield, is carried out. To utilize the knowledge gained through the pre-trained as well as the fine-tuned LMs, the embedding layer and the three LSTM layers are adopted as is, while the decoder and softmax layers are cut-off (depending on whether the regression task is desired to use the pre-trained or a fine-tuned weights). The two linear layers of the regressors in the decoder are then initialized by using randomly distributed weights and are trained from scratch. Fine-tuning the target regressor is crucial to transfer learning as an aggressive fine-tuning might even nullify the benefits of a trained LM. In addition to discriminative fine-tuning and fit-one-cycle methods, we have also used gradual unfreezing protocol for fine-tuning the regressor.

The fine-tuning of the target-task regressor is a crucial step in transfer learning. The first approach that we used in this study for fine-tuning involves the model initialization with the pre-

trained (or fine-tuned) weights and training the full model at once. In other words, the method employing a fixed learning rate and without frozen weights constitute the first protocol. Other techniques like gradual unfreezing, discriminative learning rates etc., are the NLP-specific fine-tuning methods introduced with the ULMFiT (Supplementary section 2). In gradual unfreezing, we start with frozen weights first and the layers are unfrozen step-by-step during training and this process is repeated until the entire model is unfrozen and fine-tuned. The results presented in the manuscript are obtained by using the first protocol of fine-tuning. However, the performance comparison using both of these fine-tuning methods is also done (Supplementary sections 2 and 11).

A rigorous hyperparameter optimization is performed for fine-tuning the target-task regressor. The number of epochs and the learning rate are the hyperparameters, which are tuned on the validation set, in addition to the dropout rate. Also, the effect of number of augmented SMILES (termed as SMILES augmentation) and the gaussian noise added to the regression output is also considered for optimization (Supplementary sections 5.3, 5.8, 6.3, 6.6, 7.3, and 7.6).

## 2. Various techniques used for fine-tuning

### 2.1 Discriminative learning rates for pre-trained models

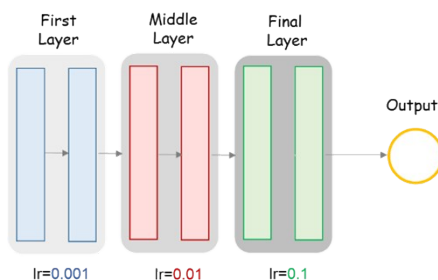

**Fig. S5.** Pictorial representation of a general case scenario using discriminative learning rates.

It has been known that different type of information is captured by different layers of the model, thus necessitating the use of the discriminative learning rate (lr). In a LM, the initial layers



contain the general information of the language and would require minimum fine-tuning. The amount of fine-tuning required increases as one moves towards the final layer. Therefore, different learning rates can be used for each layer. The initial layers are trained with lower learning rate while a higher learning rate is used for the later layers (Fig. S5). In this way, the pre-trained weights do not get drastically altered and the layers near the output are trained relatively more aggressively.

## **2.2 Fit-one-cycle**

In the fit-one-cycle method,<sup>4</sup> the learning rate (lr) is cycled between the minimum and maximum learning rates. For the duration of a training run, the lr goes from its minimum to maximum value and back again (one cycle). The higher lr during the middle of training acts as a regularization to prevent the model from over-fitting. A higher learning rate helps the network to get out of the saddle points. The lr and momentum goes in opposite directions, i.e., for a small lr, the momentum will be high and vice versa. This can help in accelerating the training.

## **2.3 Gradual unfreezing**

Fine-tuning the target regressor is crucial to transfer learning, where gradual unfreezing is a useful technique (Fig. S6). The new linear layers that contain the least information compared to the other layers, are fine-tuned first while keeping the other layers frozen (i.e., weights are not updated). The layers are unfrozen step-by-step and this process is repeated until the entire model is unfrozen and fine-tuned.

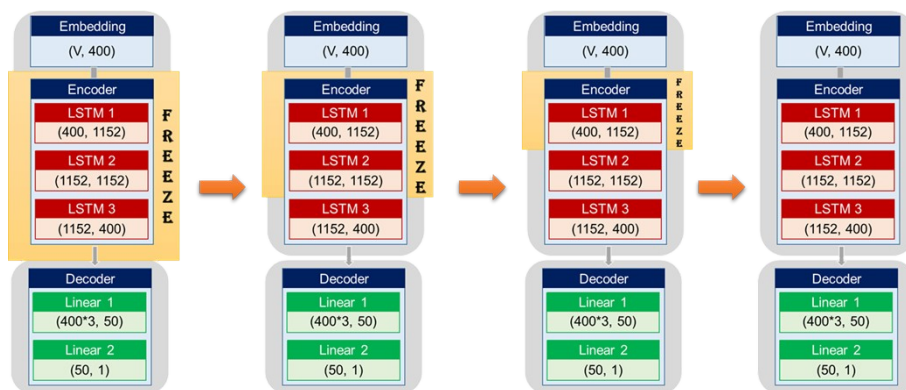

**Fig. S6.** Illustration of the gradual unfreezing approach used in the fine-tuning of the target-task regressor.

### 3. Dataset preparation

It should be noted that the reactions considered in this study, consist of multiple chemical entities such as a catalyst, substrates, additives/solvent etc., and that the reaction outcome depends on the nature of these participating species. The SMILES strings of the individual reaction partners are therefore merged together as shown in Fig. S7(a) for a representative reaction. The concatenated SMILES thus generated provides a composite representation for the desired reaction. To make these strings machine readable, the individual characters are generated through tokenization, as described in Fig. S7(b), wherein individual strings are split into tokens (e.g., ‘C’, ‘o’, ‘(’, ‘=’, ‘p’ *etc.*) separated by a dot (.). The list of unique possible tokens is called vocabulary, which is 13 for the example shown here. The total vocabulary size of 32 for reactions 1-2 and 40 for reaction-3 were required to represent all the samples in respective reaction class. These tokens are then numericalized to integers. Based on the location of a token, a unique id is assigned to each token. The encoded token is then matched to the embedding vector via one-hot encoding (Fig. S7(b)). The mapping of each of the tokens to their respective ids serves as an input for the deep learning model.



### 3.1 SMILES augmentation

Since multiple unique SMILES can represent a given molecule (Fig. S8(a)), it also allows for desirable data augmentation, particularly for problems with relatively lower data size.<sup>5</sup> The one unique SMILES representation for a molecule, that satisfies certain set of rules<sup>6</sup>, among all valid possibilities is known as the canonical SMILES. We have explored SMILES augmentation in this study. The data augmentation provides all valid SMILES with the key difference that the starting atom and direction of traversing the graph are chosen randomly. As shown in Fig. S8(a), one molecule is represented by five different SMILES representations. The process of generating these SMILES first involves the selection of the starting atom, as shown using the arrow on each molecule. Once the starting atom is selected, the direction of traversal of the 2D graph can be chosen. All these are chosen randomly and the augmented SMILES are therefore also known as randomized SMILES. For the regression task, a gaussian noise (with mean zero and standard deviation  $\sigma_{g\_noise}$ ) is added to the labels of the augmented SMILES during the training (Fig. S8(b)). The number of augmented SMILES and  $\sigma_{g\_noise}$  is tuned on the validation set.

(a)

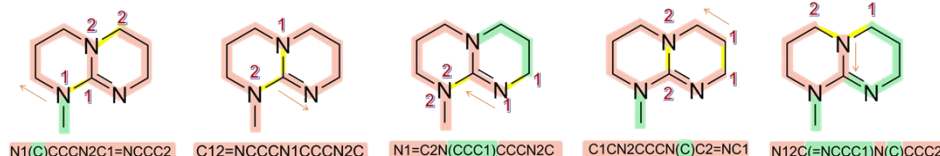

(b)

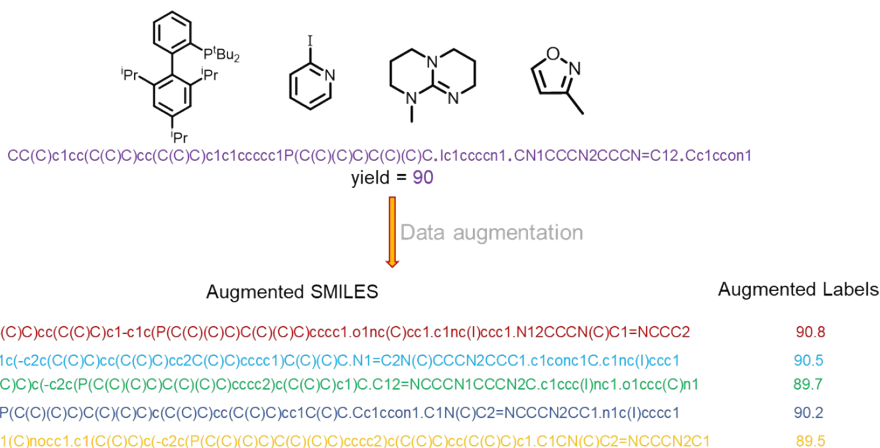

**Fig. S8.** (a) SMILES augmentation for a representative molecule. The arrow shown on each molecule indicates the starting atom considered in the generation of the SMILES representation, and (b) the data augmentation used for a reaction in the training.

### 3.2 Test time augmentation (TTA)

The test set performance is evaluated using the predictions based on the canonical SMILES as well as that employing test-time augmentation (TTA). In the former, each sample is represented by a unique SMILES whereas several augmented SMILES per sample is used in TTA and the average of the predicted values obtained from augmented SMILES is taken as the final prediction (Fig. S9).

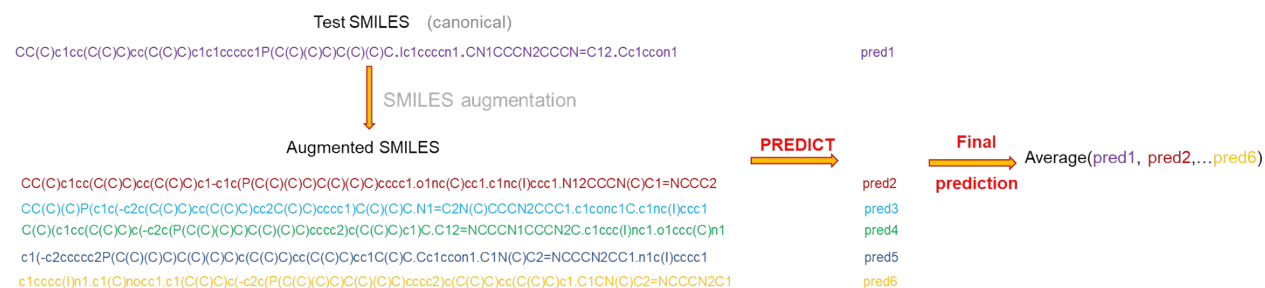

**Fig. S9.** Illustration of the test time augmentation (TTA) procedure.

## 4. Programming details

The model is implemented using PyTorch<sup>7</sup> deep learning framework and fast.ai library<sup>8</sup>. All the calculations are run using the Google Colab Pro. It provides access to T4 and P100 GPUs with memory up to 25 GB. Code, data, and instructions will be made available at <https://github.com/Sunojlab>.



| Additives                                                                           |                                                                                     |                                                                                       |                                                                                      |
|-------------------------------------------------------------------------------------|-------------------------------------------------------------------------------------|---------------------------------------------------------------------------------------|--------------------------------------------------------------------------------------|
| 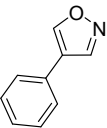   |    |     |   |
| <b>A1</b>                                                                           | <b>A2</b>                                                                           | <b>A3</b>                                                                             | <b>A4</b>                                                                            |
|    |    |     |   |
| <b>A5</b>                                                                           | <b>A6</b>                                                                           | <b>A7</b>                                                                             | <b>A8</b>                                                                            |
|    |    |     |   |
| <b>A9</b>                                                                           | <b>A10</b>                                                                          | <b>A11</b>                                                                            | <b>A12</b>                                                                           |
|    |    |     |   |
| <b>A13</b>                                                                          | <b>A14</b>                                                                          | <b>A15</b>                                                                            | <b>A16</b>                                                                           |
|   |   |    |  |
| <b>A17</b>                                                                          | <b>A18</b>                                                                          | <b>A19</b>                                                                            | <b>A20</b>                                                                           |
|  |  |  |                                                                                      |
| <b>A21</b>                                                                          | <b>A22</b>                                                                          | <b>A23</b>                                                                            |                                                                                      |

## 5.2 Target-task LM fine-tuning

The hyperparameter optimization is performed for fine-tuning the target-task LM. For this purpose, a randomized 80:20 train-test splits were used. The hyperparameters considered are listed in Table S2. In addition, effect of different number of augmented SMILES is also considered. The model is evaluated using accuracy as the error metric, as compiled in Table S2.

**Table S2.** Hyperparameter Optimization for the Target-task LM Fine-tuning

| no. of augmented SMILES                | dropout_rate | epoch <sup>a</sup> | learning rate <sup>b</sup> | train_loss | valid_loss | accuracy |
|----------------------------------------|--------------|--------------------|----------------------------|------------|------------|----------|
| varying the number of augmented SMILES |              |                    |                            |            |            |          |

|                              |     |       |              |        |        |        |
|------------------------------|-----|-------|--------------|--------|--------|--------|
| 0                            | 0.0 | [5,5] | [0.36, 0.01] | 0.0700 | 0.0872 | 0.9601 |
| 25                           | 0.0 | [5,5] | [0.36, 0.01] | 0.1942 | 0.1494 | 0.9496 |
| 50                           | 0.0 | [5,5] | [0.36, 0.01] | 0.1965 | 0.1591 | 0.9486 |
| varying the dropout rate     |     |       |              |        |        |        |
| 0                            | 0.0 | [5,5] | [0.36, 0.01] | 0.0700 | 0.0872 | 0.9601 |
| 0                            | 0.1 | [5,5] | [0.36, 0.01] | 0.0868 | 0.0902 | 0.9599 |
| 0                            | 0.2 | [5,5] | [0.36, 0.01] | 0.0846 | 0.0940 | 0.9598 |
| 0                            | 0.3 | [5,5] | [0.36, 0.01] | 0.0934 | 0.0888 | 0.9601 |
| 0                            | 0.4 | [5,5] | [0.36, 0.01] | 0.0839 | 0.0899 | 0.9599 |
| 0                            | 0.5 | [5,5] | [0.36, 0.01] | 0.0839 | 0.0875 | 0.9610 |
| 0                            | 0.6 | [5,5] | [0.36, 0.01] | 0.0833 | 0.0875 | 0.9608 |
| 0                            | 0.7 | [5,5] | [0.36, 0.01] | 0.0807 | 0.0891 | 0.9606 |
| 0                            | 0.8 | [5,5] | [0.36, 0.01] | 0.0791 | 0.0902 | 0.9600 |
| 0                            | 0.9 | [5,5] | [0.36, 0.01] | 0.0820 | 0.0887 | 0.9599 |
| 0                            | 1.0 | [5,5] | [0.36, 0.01] | 0.0799 | 0.0887 | 0.9606 |
| varying the number of epochs |     |       |              |        |        |        |
| 0                            | 0.5 | [5,5] | [0.36, 0.01] | 0.0839 | 0.0875 | 0.9610 |
| 0                            | 0.5 | [4,4] | [0.36, 0.01] | 0.0874 | 0.0886 | 0.9606 |
| 0                            | 0.5 | [4,5] | [0.36, 0.01] | 0.0898 | 0.0879 | 0.9605 |
| 0                            | 0.5 | [5,6] | [0.36, 0.01] | 0.0804 | 0.0916 | 0.9604 |
| 0                            | 0.5 | [6,6] | [0.36, 0.01] | 0.0839 | 0.0884 | 0.9603 |
| 0                            | 0.5 | [3,4] | [0.36, 0.01] | 0.0903 | 0.0877 | 0.9603 |
| varying the learning rate    |     |       |              |        |        |        |
| 0                            | 0.5 | [5,5] | [0.36, 0.01] | 0.0839 | 0.0875 | 0.9610 |
| 0                            | 0.5 | [5,5] | [1e-1, 1e-2] | 0.0838 | 0.0849 | 0.9607 |
| 0                            | 0.5 | [5,5] | [1e-1, 1e-1] | 0.3989 | 0.2013 | 0.9285 |
| 0                            | 0.5 | [5,5] | [1e-2, 1e-2] | 0.0763 | 0.0872 | 0.9605 |
| 0                            | 0.5 | [5,5] | [1e-2, 1e-3] | 0.0824 | 0.1060 | 0.9572 |
| 0                            | 0.5 | [5,5] | [1e-1, 1e-3] | 0.0809 | 0.0983 | 0.9590 |

<sup>a</sup>For the first step, the weights of the LSTM layers are kept frozen and the rest of the model is trained. In the second step, all layers are unfrozen so that the LSTM layers can be fine-tuned. <sup>b</sup>The notations such as [5,5] correspond to the number of epochs in each step and [0.36, 0.01] are the respective learning rates. One hyperparameter is varied at a time keeping others constant. The red color values and the highlighted rows respectively represent the best hyperparameter and optimal combination of the hyperparameters.

These optimal set of hyperparameters are considered for assessing the model performance on 10 independent runs on a set of randomly selected train-test splits. The model performance provided in Table S3 is reported in terms of the commonly recommended metrics such as accuracy and perplexity. An average accuracy of ~96% over 10 runs could be obtained.



**Table S3.** The Calculated Train and Test Accuracies for the Target-task LM Using the Optimal Set of Hyperparameters

| sr. no. for runs     | train_loss | test_loss | accuracy      | perplexity    |
|----------------------|------------|-----------|---------------|---------------|
| 1                    | 0.0960     | 0.0878    | 0.9605        | 1.0918        |
| 2                    | 0.0912     | 0.0895    | 0.9602        | 1.0936        |
| 3                    | 0.0943     | 0.0874    | 0.9603        | 1.0913        |
| 4                    | 0.0870     | 0.0887    | 0.9609        | 1.0928        |
| 5                    | 0.0894     | 0.0888    | 0.9609        | 1.0928        |
| 6                    | 0.0897     | 0.0863    | 0.9613        | 1.0902        |
| 7                    | 0.0873     | 0.0908    | 0.9601        | 1.0950        |
| 8                    | 0.0854     | 0.0925    | 0.9602        | 1.0969        |
| 9                    | 0.1006     | 0.0887    | 0.9610        | 1.0928        |
| 10                   | 0.0886     | 0.0859    | 0.9611        | 1.0897        |
| average over 10 runs |            |           | 0.9606±0.0004 | 1.0927±0.0022 |

### 5.3 Target-task regressor fine-tuning

The hyperparameter optimization is performed for fine-tuning the target-task regressor. For this purpose, the full data is split into 60:10:30 train-validation-test sets. All the hyperparameters are tuned on the validation set. After hyperparameter tuning, the train and validation sets are merged for prediction on the test set. The models are evaluated using root mean squared error (RMSE) as the error metric (Table S4). In addition, the effect of SMILES augmentation and the gaussian noise is also considered for optimization.

**Table S4.** Hyperparameter Optimization for the Target-task Regressor Fine-tuning

| No. of augmented SMILES                | $\sigma_{g\_noise}$ | dropout_rate | epoch <sup>a</sup> | learning_rate <sup>b</sup> | train_rmse | val_rmse |
|----------------------------------------|---------------------|--------------|--------------------|----------------------------|------------|----------|
| varying the number of augmented SMILES |                     |              |                    |                            |            |          |
| 0                                      | n.a                 | 0.0          | [5,6,6,6]          | [0.1,0.01,0.001,0.001]     | 10.8029    | 9.6842   |
| 10                                     | 0.0                 | 0.0          | [5,6,6,6]          | [0.1,0.01,0.001,0.001]     | 8.1298     | 9.0649   |
| 15                                     | 0.0                 | 0.0          | [5,6,6,6]          | [0.1,0.01,0.001,0.001]     | 7.5225     | 8.2353   |
| 20                                     | 0.0                 | 0.0          | [5,6,6,6]          | [0.1,0.01,0.001,0.001]     | 7.2568     | 7.9294   |
| 25                                     | 0.0                 | 0.0          | [5,6,6,6]          | [0.1,0.01,0.001,0.001]     | 7.6340     | 7.3684   |
| 30                                     | 0.0                 | 0.0          | [5,6,6,6]          | [0.1,0.01,0.001,0.001]     | 8.2082     | 8.7325   |
| varying the $\sigma_{g\_noise}$        |                     |              |                    |                            |            |          |

|                              |     |     |           |                           |         |         |
|------------------------------|-----|-----|-----------|---------------------------|---------|---------|
| 25                           | 0.0 | 0.0 | [5,6,6,6] | [0.1,0.01,0.001,0.001]    | 7.6340  | 7.3684  |
| 25                           | 0.1 | 0.0 | [5,6,6,6] | [0.1,0.01,0.001,0.001]    | 7.5186  | 7.7146  |
| 25                           | 0.2 | 0.0 | [5,6,6,6] | [0.1,0.01,0.001,0.001]    | 7.5637  | 7.6486  |
| 25                           | 0.3 | 0.0 | [5,6,6,6] | [0.1,0.01,0.001,0.001]    | 7.6618  | 7.2703  |
| 25                           | 0.4 | 0.0 | [5,6,6,6] | [0.1,0.01,0.001,0.001]    | 7.7821  | 7.6305  |
| 25                           | 0.5 | 0.0 | [5,6,6,6] | [0.1,0.01,0.001,0.001]    | 7.3672  | 7.3831  |
| 25                           | 0.6 | 0.0 | [5,6,6,6] | [0.1,0.01,0.001,0.001]    | 7.5718  | 7.0591  |
| 25                           | 0.7 | 0.0 | [5,6,6,6] | [0.1,0.01,0.001,0.001]    | 7.4483  | 7.2374  |
| 25                           | 0.8 | 0.0 | [5,6,6,6] | [0.1,0.01,0.001,0.001]    | 7.5554  | 7.5259  |
| varying the dropout rate     |     |     |           |                           |         |         |
| 25                           | 0.6 | 0.0 | [5,6,6,6] | [0.1,0.01,0.001,0.001]    | 7.5718  | 7.0591  |
| 25                           | 0.6 | 0.1 | [5,6,6,6] | [0.1,0.01,0.001,0.001]    | 8.4280  | 7.8635  |
| 25                           | 0.6 | 0.2 | [5,6,6,6] | [0.1,0.01,0.001,0.001]    | 9.2801  | 8.4921  |
| 25                           | 0.6 | 0.3 | [5,6,6,6] | [0.1,0.01,0.001,0.001]    | 9.7898  | 8.7552  |
| 25                           | 0.6 | 0.4 | [5,6,6,6] | [0.1,0.01,0.001,0.001]    | 10.2815 | 9.5502  |
| 25                           | 0.6 | 0.5 | [5,6,6,6] | [0.1,0.01,0.001,0.001]    | 11.0629 | 10.0120 |
| varying the number of epochs |     |     |           |                           |         |         |
| 25                           | 0.6 | 0.0 | [5,6,6,6] | [0.1,0.01,0.001,0.001]    | 7.5718  | 7.0591  |
| 25                           | 0.6 | 0.0 | [5,5,6,6] | [0.1,0.01,0.001,0.001]    | 7.7014  | 7.4396  |
| 25                           | 0.6 | 0.0 | [5,5,5,6] | [0.1,0.01,0.001,0.001]    | 7.8237  | 7.5924  |
| 25                           | 0.6 | 0.0 | [5,5,5,5] | [0.1,0.01,0.001,0.001]    | 7.6767  | 7.6799  |
| varying the learning rate    |     |     |           |                           |         |         |
| 25                           | 0.6 | 0.0 | [5,6,6,6] | [0.1,0.01,0.001,0.001]    | 7.5718  | 7.0591  |
| 25                           | 0.6 | 0.0 | [5,6,6,6] | [0.001,0.001,0.001,0.001] | 7.6009  | 7.2955  |
| 25                           | 0.6 | 0.0 | [5,6,6,6] | [0.1,0.1,0.01,0.01]       | 12.6780 | 12.0981 |
| 25                           | 0.6 | 0.0 | [5,6,6,6] | [0.1,0.01,0.001,0.0001]   | 7.8873  | 7.3135  |

<sup>a</sup>The regressor is fine-tuned using gradual unfreezing method in four steps: (i) the regressor, (ii) the regressor and the final LSTM layer, (iii) the regressor and the last two LSTM layers, and (iv) the full model. <sup>b</sup>A notations such as [5,6,6,6] and [0.1,0.01,0.001,0.001] respectively corresponds to the number of epochs used in each of these steps and the respective learning rates. The values shown in red color and the highlighted rows respectively represent the best hyperparameter and optimal combination of the hyperparameters.

The target-task regressor can be fine-tuned on both the general-domain and target-task LM. The same set of hyperparameters is used in both cases. We have considered 70:30 as well as 80:20 train-test splits. The final performance is reported in terms of RMSE, which is obtained as the average over 30 independent runs on randomized splits of the data. The results are shown in Tables S5 and S6. It is to be noted that the train-test splits for all models, **TL-m1/m2** (with and without gradual unfreezing) and **TL-m0** were maintained the same.

**Table S5.** Test and Train RMSEs in the Fine-tuning of the Target-task Regressor using a 70:30 Train-test Split<sup>a</sup>

| sr. no.<br>for<br>runs | fine-tuning on general-domain LM |                          |                    | fine-tuning on target-task LM |                          |                    |
|------------------------|----------------------------------|--------------------------|--------------------|-------------------------------|--------------------------|--------------------|
|                        | train_RMSE                       | test_RMSE<br>(canonical) | test_RMSE<br>(TTA) | train_RMSE                    | test_RMSE<br>(canonical) | test_RMSE<br>(TTA) |
| 1                      | 6.4533                           | 6.8233                   | 7.0304             | 7.5313                        | 7.5035                   | 7.5217             |
| 2                      | 6.1083                           | 6.3448                   | 6.9809             | 7.3694                        | 6.8757                   | 6.8035             |
| 3                      | 6.0067                           | 6.4718                   | 6.603              | 8.0548                        | 7.0367                   | 7.0453             |
| 4                      | 6.0313                           | 6.9782                   | 7.3341             | 7.3733                        | 7.5256                   | 7.6526             |
| 5                      | 6.1772                           | 6.4124                   | 6.8022             | 7.4337                        | 7.4487                   | 7.5329             |
| 6                      | 5.8693                           | 6.4129                   | 6.7227             | 7.4207                        | 7.4089                   | 7.4744             |
| 7                      | 5.8526                           | 6.6345                   | 7.2806             | 6.8089                        | 6.9890                   | 6.9129             |
| 8                      | 5.8161                           | 6.3125                   | 6.5126             | 7.4027                        | 6.4263                   | 6.4965             |
| 9                      | 6.1986                           | 7.2967                   | 7.8244             | 7.3881                        | 7.9734                   | 7.7509             |
| 10                     | 6.0064                           | 7.3771                   | 8.1775             | 7.3081                        | 7.9528                   | 8.1098             |
| avg.                   | 6.05±0.19                        | 6.71±0.40                | 7.13±0.54          | 7.41±0.30                     | 7.31±0.48                | 7.33±0.50          |

<sup>a</sup> The detail on the canonical and TTA SMILES is provided in Section 3.2.

**Table S6.** Test and Train RMSEs in the Fine-tuning of the Target-task Regressor on a 80:20 Train-test Split<sup>a</sup>

| sr. no.<br>for<br>runs | fine-tuning on general-domain LM |                          |                    | fine-tuning on target-task LM |                          |                    |
|------------------------|----------------------------------|--------------------------|--------------------|-------------------------------|--------------------------|--------------------|
|                        | train_RMSE                       | test_RMSE<br>(canonical) | test_RMSE<br>(TTA) | train_RMSE                    | test_RMSE<br>(canonical) | test_RMSE<br>(TTA) |
| 1                      | 6.2294                           | 5.8601                   | 6.2804             | 7.3763                        | 6.5234                   | 6.5134             |
| 2                      | 6.0269                           | 6.0522                   | 6.4118             | 6.8260                        | 6.8342                   | 6.5356             |
| 3                      | 6.3975                           | 5.6400                   | 5.9920             | 7.4568                        | 6.7074                   | 6.7297             |
| 4                      | 5.8919                           | 6.0474                   | 6.7786             | 6.9291                        | 6.9419                   | 6.9588             |
| 5                      | 6.7984                           | 6.3203                   | 6.7909             | 7.5181                        | 6.6594                   | 6.4822             |
| 6                      | 5.6971                           | 5.7310                   | 6.0720             | 6.9437                        | 6.8856                   | 6.7541             |
| 7                      | 5.7554                           | 6.5289                   | 7.0019             | 7.0235                        | 7.2600                   | 7.2970             |
| 8                      | 6.1219                           | 5.6889                   | 5.9164             | 7.0827                        | 6.4973                   | 6.4020             |
| 9                      | 5.9101                           | 6.1526                   | 6.3930             | 6.8993                        | 7.0935                   | 6.9493             |
| 10                     | 5.6370                           | 6.0044                   | 6.4834             | 6.8524                        | 6.8616                   | 6.7792             |
| 11                     | 5.8242                           | 5.9243                   | 6.1411             | 7.1424                        | 6.4003                   | 6.4171             |
| 12                     | 6.1774                           | 6.1630                   | 6.3646             | 7.0587                        | 6.6822                   | 6.6822             |
| 13                     | 6.1666                           | 6.2677                   | 6.5755             | 6.8645                        | 6.4842                   | 6.6441             |
| 14                     | 6.2381                           | 5.9397                   | 6.3149             | 6.9154                        | 6.2060                   | 6.2769             |
| 15                     | 6.2911                           | 6.0899                   | 6.5439             | 7.0129                        | 6.6084                   | 6.6265             |
| 16                     | 6.6277                           | 6.5562                   | 6.7752             | 7.2204                        | 7.0100                   | 7.0320             |

|      |           |           |           |           |           |           |
|------|-----------|-----------|-----------|-----------|-----------|-----------|
| 17   | 5.8452    | 6.0921    | 6.6174    | 6.7978    | 6.8195    | 6.9653    |
| 18   | 6.1447    | 6.2053    | 6.2457    | 7.0745    | 6.7582    | 6.6712    |
| 19   | 6.2606    | 5.3860    | 5.7325    | 7.2278    | 6.1461    | 6.2084    |
| 20   | 6.1292    | 5.6448    | 5.9941    | 6.8922    | 6.427     | 6.3275    |
| 21   | 6.4961    | 5.7861    | 6.1623    | 7.2003    | 6.1036    | 6.1036    |
| 22   | 6.1829    | 6.1405    | 6.6096    | 6.7101    | 6.6112    | 6.3908    |
| 23   | 6.0820    | 6.1022    | 6.2885    | 7.0068    | 6.8911    | 6.8572    |
| 24   | 6.2985    | 6.0198    | 6.3249    | 7.0876    | 6.8032    | 6.8834    |
| 25   | 6.4458    | 6.2781    | 6.7553    | 7.0195    | 6.8335    | 6.8358    |
| 26   | 6.3390    | 6.2569    | 6.7481    | 7.0289    | 6.8586    | 6.8091    |
| 27   | 5.8508    | 5.4504    | 5.9414    | 7.1111    | 6.5193    | 6.3902    |
| 28   | 5.9434    | 5.7649    | 6.3735    | 6.8771    | 6.7835    | 6.6399    |
| 29   | 6.0857    | 6.2369    | 6.2361    | 7.0917    | 6.6127    | 6.5899    |
| 30   | 6.4922    | 6.4072    | 6.7045    | 7.3085    | 6.9906    | 7.0054    |
| avg. | 6.15±0.28 | 6.02±0.29 | 6.39±0.31 | 7.05±0.19 | 6.69±0.27 | 6.66±0.28 |

<sup>a</sup>The detail on the canonical and TTA SMILES is provided in Section 3.2.

## 5.4 Training the target-task regressor from scratch

In order to assess the impact of transfer learning, the target-task regressor is trained from scratch.

Since we are not using any pre-trained or fine-tuned weights, there are no weights to freeze and then use gradual unfreezing. Thus, gradual unfreezing method does not apply to the results of

**TL-m0**. The details of separate tuning of the hyperparameters are given in Table S7.

**Table S7.** Hyperparameter Optimization for Training the Target-task Regressor from Scratch<sup>a</sup>

| No. of augmented SMILES                | $\sigma_{g\_noise}$ | dropout_rate | epoch | learning rate | train_rmse | val_rmse |
|----------------------------------------|---------------------|--------------|-------|---------------|------------|----------|
| varying the number of augmented SMILES |                     |              |       |               |            |          |
| 0                                      | na                  | 0.0          | 10    | 0.001         | 39.0246    | 30.0918  |
| 10                                     | 0.0                 | 0.0          | 10    | 0.001         | 10.6959    | 10.2909  |
| 15                                     | 0.0                 | 0.0          | 10    | 0.001         | 10.8605    | 10.4168  |
| 20                                     | 0.0                 | 0.0          | 10    | 0.001         | 7.8769     | 8.1942   |
| 25                                     | 0.0                 | 0.0          | 10    | 0.001         | 7.6071     | 7.5361   |
| 30                                     | 0.0                 | 0.0          | 10    | 0.001         | 6.8265     | 6.7222   |
| 35                                     | 0.0                 | 0.0          | 10    | 0.001         | 6.3798     | 6.6649   |
| 40                                     | 0.0                 | 0.0          | 10    | 0.001         | 6.0463     | 5.7198   |
| 45                                     | 0.0                 | 0.0          | 10    | 0.001         | 5.3750     | 5.9869   |
| varying the $\sigma_{g\_noise}$        |                     |              |       |               |            |          |
| 40                                     | 0.0                 | 0.0          | 10    | 0.001         | 6.0463     | 5.7198   |
| 40                                     | 0.1                 | 0.0          | 10    | 0.001         | 6.0463     | 5.9628   |

|                              |     |     |    |       |         |         |
|------------------------------|-----|-----|----|-------|---------|---------|
| 40                           | 0.2 | 0.0 | 10 | 0.001 | 6.0395  | 5.8264  |
| 40                           | 0.4 | 0.0 | 10 | 0.001 | 6.0557  | 6.3966  |
| 40                           | 0.6 | 0.0 | 10 | 0.001 | 6.0179  | 6.2987  |
| varying the dropout rate     |     |     |    |       |         |         |
| 40                           | 0.0 | 0.0 | 10 | 0.001 | 6.0463  | 5.7198  |
| 40                           | 0.0 | 0.1 | 10 | 0.001 | 6.6042  | 5.6645  |
| 40                           | 0.0 | 0.2 | 10 | 0.001 | 6.8145  | 5.9371  |
| 40                           | 0.0 | 0.3 | 10 | 0.001 | 7.1548  | 6.0101  |
| varying the learning rate    |     |     |    |       |         |         |
| 40                           | 0.0 | 0.0 | 10 | 0.001 | 6.0463  | 5.7198  |
| 40                           | 0.0 | 0.0 | 10 | 0.01  | 6.5501  | 6.3464  |
| 40                           | 0.0 | 0.0 | 10 | 0.1   | 27.3110 | 25.7869 |
| varying the number of epochs |     |     |    |       |         |         |
| 40                           | 0.0 | 0.0 | 10 | 0.001 | 6.0463  | 5.7198  |
| 40                           | 0.0 | 0.0 | 15 | 0.001 | 5.4928  | 5.6153  |
| 40                           | 0.0 | 0.0 | 20 | 0.001 | 5.4433  | 5.8047  |

<sup>a</sup>The values shown in red color and the highlighted rows respectively represent the best hyperparameter and optimal combination of the hyperparameters.

We have performed all the calculations on 70:30 as well as 80:20 train-test splits. The final performance is reported in terms of the average RMSE over 30 independent runs consisting of randomized split of samples. The results are shown in Table S8.

**Table S8.** Test and Train RMSEs for the Training of Target-task Regressor on 70:30 and 80:20 Train-test Splits<sup>a</sup>

| sr. no.<br>for<br>runs | 70:30 split |                          |                    | 80:20 split |                          |                    |
|------------------------|-------------|--------------------------|--------------------|-------------|--------------------------|--------------------|
|                        | train_RMSE  | test_RMSE<br>(canonical) | test_RMSE<br>(TTA) | train_RMSE  | test_RMSE<br>(canonical) | test_RMSE<br>(TTA) |
| 1                      | 6.3381      | 5.8502                   | 5.5977             | 7.0893      | 5.4984                   | 5.3419             |
| 2                      | 6.1036      | 5.8955                   | 5.6760             | 6.4479      | 5.7267                   | 5.6131             |
| 3                      | 5.9529      | 5.2694                   | 5.0250             | 7.2583      | 5.5663                   | 5.4422             |
| 4                      | 5.8306      | 5.8932                   | 5.7422             | 6.6200      | 6.2168                   | 5.9782             |
| 5                      | 5.6882      | 5.8267                   | 5.7434             | 6.6236      | 6.2188                   | 6.1086             |
| 6                      | 5.9004      | 5.8004                   | 5.5501             | 6.5040      | 5.9542                   | 5.8010             |
| 7                      | 5.6354      | 5.6541                   | 5.5672             | 6.4047      | 6.3889                   | 6.0299             |
| 8                      | 5.8518      | 5.0614                   | 4.8203             | 6.1282      | 5.7422                   | 5.3796             |
| 9                      | 5.7785      | 6.1539                   | 5.8603             | 6.7609      | 5.4653                   | 5.2451             |
| 10                     | 6.0280      | 6.2022                   | 6.0928             | 6.6262      | 5.8288                   | 5.5447             |
| avg.                   | 5.91±0.21   | 5.76±0.36                | 5.57±0.38          | 6.65±0.33   | 5.86±0.32                | 5.65±0.31          |

<sup>a</sup>The detail on the canonical and TTA SMILES is provided in Section 3.2.

**Table S9.** Test and Train RMSEs for the Training of Target-task Regressor from Scratch on 80:20 Train-test Splits<sup>a</sup>

| sr. no. for runs | train_RMSE | test_RMSE<br>(canonical) | test_RMSE<br>(TTA) |
|------------------|------------|--------------------------|--------------------|
| 1                | 7.0893     | 5.4984                   | 5.3419             |
| 2                | 6.4479     | 5.7267                   | 5.6131             |
| 3                | 7.2583     | 5.5663                   | 5.4422             |
| 4                | 6.6200     | 6.2168                   | 5.9782             |
| 5                | 6.6236     | 6.2188                   | 6.1086             |
| 6                | 6.5040     | 5.9542                   | 5.801              |
| 7                | 6.4047     | 6.3889                   | 6.0299             |
| 8                | 6.1282     | 5.7422                   | 5.3796             |
| 9                | 6.7609     | 5.4653                   | 5.2451             |
| 10               | 6.6262     | 5.8288                   | 5.5447             |
| 11               | 6.3694     | 5.6834                   | 5.3749             |
| 12               | 6.4468     | 5.4161                   | 5.3669             |
| 13               | 6.6337     | 6.1422                   | 5.823              |
| 14               | 6.6236     | 6.4495                   | 6.1944             |
| 15               | 6.6236     | 5.8336                   | 5.6069             |
| 16               | 6.2396     | 5.7983                   | 5.5315             |
| 17               | 6.9875     | 7.3926                   | 7.224              |
| 18               | 7.0065     | 5.9912                   | 5.8932             |
| 19               | 6.7311     | 5.7036                   | 5.4764             |
| 20               | 7.0125     | 5.3726                   | 5.2885             |
| 21               | 6.4365     | 5.5263                   | 5.313              |
| 22               | 6.8117     | 5.637                    | 5.542              |
| 23               | 6.8005     | 5.4132                   | 5.3039             |
| 24               | 6.8355     | 5.8782                   | 5.5746             |
| 25               | 6.6130     | 5.372                    | 5.1057             |
| 26               | 7.3400     | 6.8711                   | 6.6689             |
| 27               | 6.2629     | 4.9994                   | 4.7606             |
| 28               | 6.8315     | 5.341                    | 5.3356             |
| 29               | 6.7110     | 5.7549                   | 5.3379             |
| 30               | 6.6449     | 6.1499                   | 6.034              |
| avg.             | 6.68±0.29  | 5.84±0.49                | 5.64±0.48          |

<sup>a</sup>The detail on the canonical and TTA SMILES is provided in Section 3.2.

It can be noticed from Table S9 that the results are comparable to that obtained using the TL model involving the fine-tuning of the target-task regressor, as presented in Table S6. For

reaction-1, with a rich and well-distributed data distribution, the model architecture even without TL seems to be sufficient.

## 5.5 Y-randomization

The output values are shuffled randomly between various rows (samples) in such a way that in the new dataset no sample is associated with its true output value. With these randomized target values, we fine-tuned the regressor on the general-domain LM. The results for both 70:30 and 80:20 train-test splits are shown in Table S10. The test and train RMSEs are found to be much inferior as compared to when original outputs were used. This is an important observation that assures that the representation of samples using their respective SMILES help algorithm learn well enough to perform the overall tasks, such as the desired regression.

**Table S10.** Test and Train RMSEs for the Training of the Target-task Regressor on 70:30 and 80:20 Train-test Splits in y-Randomization Runs<sup>a</sup>

| sr. no.<br>for<br>runs | 70:30 split |                          |                    | 80:20 split |                          |                    |
|------------------------|-------------|--------------------------|--------------------|-------------|--------------------------|--------------------|
|                        | train_RMSE  | test_RMSE<br>(canonical) | test_RMSE<br>(TTA) | train_RMSE  | test_RMSE<br>(canonical) | test_RMSE<br>(TTA) |
| 1                      | 12.7212     | 25.1581                  | 31.5939            | 12.2646     | 26.1920                  | 24.7763            |
| 2                      | 15.3640     | 25.4082                  | 32.1831            | 15.2290     | 24.1319                  | 23.5969            |
| 3                      | 14.3583     | 25.4397                  | 27.1138            | 15.1000     | 25.6805                  | 24.7502            |
| 4                      | 14.3202     | 25.4186                  | 30.4887            | 18.7735     | 23.6468                  | 24.2945            |
| 5                      | 13.4355     | 24.391                   | 29.6586            | 16.0224     | 24.5513                  | 24.2439            |
| 6                      | 12.7524     | 25.2093                  | 25.2796            | 15.2915     | 24.4042                  | 24.7140            |
| 7                      | 13.2924     | 24.9921                  | 25.1111            | 15.0952     | 25.4276                  | 27.0062            |
| 8                      | 15.2859     | 24.6682                  | 24.4178            | 15.9007     | 25.3792                  | 24.4830            |
| 9                      | 14.8447     | 25.0929                  | 27.2585            | 14.5821     | 25.2550                  | 24.4093            |
| 10                     | 14.7910     | 24.9346                  | 29.6291            | 13.6610     | 25.2007                  | 26.9785            |
| avg.                   | 14.12±1.00  | 25.07±0.34               | 28.27±2.81         | 15.19±1.68  | 24.99±0.78               | 24.93±1.14         |

<sup>a</sup>The detail on the canonical and TTA SMILES is provided in Section 3.2.

## 5.6 Out-of-bag performance

In order to evaluate the predictive performance of our model on more challenging data splits, we have used the same out-of-bag splits as that in the original work (ref. 18a in the main

manuscript). Here, 15 additives (**A1-A15**) are kept in the training set and rest of the 8 additives (**A16-A23**) are present only in the test set (Table S1). We could obtain an average RMSE of 10.0 over all additives. Performance of individual additives is provided in Table S11.

**Table S11.** Out-of-sample Performance of Various Additives

| Additive   | RMSE (ULMFiT) | RMSE (random forest) |
|------------|---------------|----------------------|
| <b>A16</b> | 10.1          | 6.9                  |
| <b>A17</b> | 6.8           | 10.5                 |
| <b>A18</b> | 11.1          | 13.7                 |
| <b>A19</b> | 12.1          | 14.8                 |
| <b>A20</b> | 7.5           | 8.6                  |
| <b>A21</b> | 12.3          | 11.8                 |
| <b>A22</b> | 11.2          | 12.7                 |
| <b>A23</b> | 9.0           | 9.2                  |
| avg.       | 10.0          | 11.3                 |

## 5.7 Reaction SMILES for prediction

We have used the full reaction SMILES in the following form as an input to the model:

{catalyst}. {arylhalide}. {base}. {additive}>>{product}

The results for 10 different runs on 80:20 train-test split is provided in Table S12. No improvement in the performance is observed with the inclusion of product SMILES (see Table S6 for the comparison).

**Table S12.** Test and Train RMSEs on a 80:20 Train-test Split with Reaction SMILES and **TL-m1** Model<sup>a</sup>

| sr. no. for runs | train_RMSE | test_RMSE (canonical) | test_RMSE (TTA) |
|------------------|------------|-----------------------|-----------------|
| 1                | 7.1377     | 6.2457                | 6.553           |
| 2                | 7.0245     | 7.0551                | 7.3024          |
| 3                | 7.4928     | 6.9168                | 7.1621          |
| 4                | 7.1362     | 7.2082                | 7.688           |
| 5                | 7.5346     | 6.4471                | 6.8722          |
| 6                | 6.8675     | 7.0831                | 7.2513          |
| 7                | 6.7266     | 7.2489                | 7.5919          |
| 8                | 6.7776     | 6.1775                | 6.4546          |
| 9                | 7.3730     | 6.6223                | 7.1474          |



|      |           |           |           |
|------|-----------|-----------|-----------|
| 10   | 6.7575    | 6.436     | 6.7206    |
| avg. | 7.08±0.31 | 6.74±0.41 | 7.07±0.42 |

<sup>a</sup>The detail on the canonical and TTA SMILES is provided in Section 3.2.

## 5.8 Target-task regressor fine-tuning without gradual unfreezing and with a constant learning rate

The hyperparameter optimization is performed for fine-tuning the target-task regressor. For this purpose, the full data is split into 70:10:20 train-validation-test sets. All the hyperparameters are tuned on the validation set. After hyperparameter tuning, the train and validation sets are merged for prediction on the test set. The models are evaluated using root mean squared error (RMSE) as the error metric (Table S13).

**Table S13.** Hyperparameter Optimization for Fine-tuning the Target-task Regressor Without Gradual Unfreezing<sup>a</sup>

| No. of augmented SMILES                | $\sigma_{g\_noise}$ | dropout_rate | epoch | learning rate | train_rmse | val_rmse |
|----------------------------------------|---------------------|--------------|-------|---------------|------------|----------|
| varying the number of augmented SMILES |                     |              |       |               |            |          |
| 0                                      | na                  | 0.0          | 10    | 0.001         | 36.5606    | 34.6588  |
| 5                                      | 0.0                 | 0.0          | 10    | 0.001         | 9.7016     | 11.1785  |
| 10                                     | 0.0                 | 0.0          | 10    | 0.001         | 6.7458     | 7.4287   |
| 15                                     | 0.0                 | 0.0          | 10    | 0.001         | 6.5306     | 7.4907   |
| 20                                     | 0.0                 | 0.0          | 10    | 0.001         | 6.2362     | 6.9913   |
| 25                                     | 0.0                 | 0.0          | 10    | 0.001         | 5.7489     | 6.7347   |
| 35                                     | 0.0                 | 0.0          | 10    | 0.001         | 5.7612     | 6.1485   |
| 40                                     | 0.0                 | 0.0          | 10    | 0.001         | 5.8675     | 6.1029   |
| 45                                     | 0.0                 | 0.0          | 10    | 0.001         | 6.2896     | 5.6366   |
| varying the $\sigma_{g\_noise}$        |                     |              |       |               |            |          |
| 40                                     | 0.0                 | 0.0          | 10    | 0.001         | 5.8675     | 6.1029   |
| 40                                     | 0.2                 | 0.0          | 10    | 0.001         | 5.8963     | 6.3416   |
| 40                                     | 0.4                 | 0.0          | 10    | 0.001         | 5.8806     | 6.3349   |
| varying the dropout rate               |                     |              |       |               |            |          |
| 40                                     | 0.0                 | 0.0          | 10    | 0.001         | 5.8675     | 6.1029   |
| 40                                     | 0.0                 | 0.1          | 10    | 0.001         | 7.0093     | 6.6168   |
| 40                                     | 0.0                 | 0.2          | 10    | 0.001         | 7.6310     | 7.1578   |
| varying the learning rate              |                     |              |       |               |            |          |
| 40                                     | 0.0                 | 0.0          | 10    | 0.001         | 5.8675     | 6.1029   |
| 40                                     | 0.0                 | 0.0          | 10    | 0.01          | 8.8085     | 9.0126   |
| 40                                     | 0.0                 | 0.0          | 10    | 0.0001        | 22.3905    | 21.2704  |

| varying the number of epochs |     |     |    |       |        |        |
|------------------------------|-----|-----|----|-------|--------|--------|
| 40                           | 0.0 | 0.0 | 10 | 0.001 | 5.8675 | 6.1029 |
| 40                           | 0.0 | 0.0 | 15 | 0.001 | 5.5162 | 5.8514 |
| 40                           | 0.0 | 0.0 | 20 | 0.001 | 4.9379 | 5.5462 |

<sup>a</sup>The values shown in red color and the highlighted rows respectively represent the best hyperparameter and optimal combination of the hyperparameters.

The final performance is reported in terms of RMSE is obtained as the average over 30 independent runs on randomized splits of the data. The results obtained after fine-tuning the regressor on general-domain LM are shown in Table S14. During training, since the data size is large, batch gradient descent is used. In each epoch, the training error is reported as an average over all the batches. If the training error is high at the beginning of an epoch and reduces as the model parameters are updated, it is possible that this average train error remains higher than the test error.

**Table S14.** Test and Train RMSEs for the Training of Target-task Regressor on 70:30 and 80:20 Train-test Splits<sup>a</sup>

| sr. no.<br>for<br>runs | 70:30 split |                          |                                    | 80:20 split |                          |                                    |
|------------------------|-------------|--------------------------|------------------------------------|-------------|--------------------------|------------------------------------|
|                        | train_RMSE  | test_RMSE<br>(canonical) | test_R <sup>2</sup><br>(canonical) | train_RMSE  | test_RMSE<br>(canonical) | test_R <sup>2</sup><br>(canonical) |
| 1                      | 5.4112      | 4.8409                   | 0.9693                             | 5.3672      | 4.8194                   | 0.9696                             |
| 2                      | 4.8020      | 5.601                    | 0.9584                             | 5.3392      | 5.2725                   | 0.9629                             |
| 3                      | 5.5573      | 4.6125                   | 0.9709                             | 5.6224      | 4.6599                   | 0.9700                             |
| 4                      | 5.3713      | 5.3914                   | 0.9604                             | 6.3896      | 4.8968                   | 0.9676                             |
| 5                      | 5.4172      | 5.0444                   | 0.9659                             | 6.6677      | 5.2238                   | 0.9629                             |
| 6                      | 5.2438      | 4.8443                   | 0.969                              | 6.4651      | 4.4971                   | 0.9734                             |
| 7                      | 5.1243      | 5.5051                   | 0.9597                             | 5.8503      | 4.8345                   | 0.9697                             |
| 8                      | 5.1806      | 4.439                    | 0.9736                             | 6.1494      | 4.3657                   | 0.9748                             |
| 9                      | 6.0628      | 4.9096                   | 0.9677                             | 6.3450      | 4.7053                   | 0.9709                             |
| 10                     | 5.4905      | 5.8752                   | 0.955                              | 6.2308      | 4.2878                   | 0.9753                             |
| avg.                   | 5.37±0.33   | 5.11±0.47                | 0.96±0.01                          | 6.04±0.47   | 4.76±0.33                | 0.97±0.004                         |

<sup>a</sup> The detail of canonical SMILES is provided in Section 3.2.

**Table S15.** Test and Train RMSEs for the Training of Target-task Regressor on 80:20 Train-test Splits<sup>a</sup>

| sr. no. for runs | train_RMSE | test_RMSE<br>(canonical) | test_R <sup>2</sup><br>(canonical) |
|------------------|------------|--------------------------|------------------------------------|
| 1                | 5.3672     | 4.8194                   | 0.9696                             |
| 2                | 5.3392     | 5.2725                   | 0.9629                             |
| 3                | 5.6224     | 4.6599                   | 0.9700                             |
| 4                | 6.3896     | 4.8968                   | 0.9676                             |
| 5                | 6.6677     | 5.2238                   | 0.9629                             |
| 6                | 6.4651     | 4.4971                   | 0.9734                             |
| 7                | 5.8503     | 4.8345                   | 0.9697                             |
| 8                | 6.1494     | 4.3657                   | 0.9748                             |
| 9                | 6.3450     | 4.7053                   | 0.9709                             |
| 10               | 6.2308     | 4.2878                   | 0.9753                             |
| 11               | 5.5435     | 5.0420                   | 0.9655                             |
| 12               | 5.4156     | 4.9344                   | 0.9676                             |
| 13               | 5.5457     | 5.2232                   | 0.9644                             |
| 14               | 5.3502     | 5.0500                   | 0.9648                             |
| 15               | 5.2839     | 5.1569                   | 0.9642                             |
| 16               | 5.2359     | 5.3411                   | 0.9621                             |
| 17               | 5.3501     | 4.7711                   | 0.9684                             |
| 18               | 5.5120     | 5.2757                   | 0.9630                             |
| 19               | 5.6664     | 4.9612                   | 0.9650                             |
| 20               | 5.4169     | 4.7538                   | 0.9687                             |
| 21               | 5.3129     | 4.7336                   | 0.9702                             |
| 22               | 5.2394     | 5.0722                   | 0.9660                             |
| 23               | 5.2054     | 4.9655                   | 0.9674                             |
| 24               | 5.9960     | 4.9805                   | 0.9649                             |
| 25               | 5.5912     | 4.6390                   | 0.9701                             |
| 26               | 5.8492     | 5.2046                   | 0.9619                             |
| 27               | 4.9498     | 4.0351                   | 0.9776                             |
| 28               | 5.4010     | 4.6169                   | 0.9726                             |
| 29               | 5.1603     | 4.8954                   | 0.9684                             |
| 30               | 5.5579     | 5.4164                   | 0.9590                             |
| avg.             | 5.63±0.44  | 4.89±0.33                | 0.97±0.004                         |

<sup>a</sup>The detail on the canonical and TTA SMILES is provided in Section 3.2.

The result of fine-tuning the regressor on target-task LM is provided in Table S16.

**Table S16.** Test and Train RMSEs for the Training of Target-task Regressor on 80:20 Train-test Splits<sup>a</sup>

| sr. no. for runs | train_RMSE | test_RMSE<br>(canonical) | test_R <sup>2</sup><br>(canonical) |
|------------------|------------|--------------------------|------------------------------------|
| 1                | 6.7221     | 4.608                    | 0.9722                             |
| 2                | 5.6606     | 5.2294                   | 0.9635                             |

|      |           |           |            |
|------|-----------|-----------|------------|
| 3    | 7.1952    | 4.826     | 0.9678     |
| 4    | 6.6770    | 4.9726    | 0.9666     |
| 5    | 6.9531    | 5.463     | 0.9594     |
| 6    | 6.6729    | 5.0676    | 0.9663     |
| 7    | 6.1477    | 5.26      | 0.9641     |
| 8    | 6.4539    | 4.5177    | 0.973      |
| 9    | 6.6296    | 5.2198    | 0.9641     |
| 10   | 6.5286    | 4.7361    | 0.9699     |
| 11   | 5.9328    | 5.6199    | 0.9572     |
| 12   | 5.8110    | 5.3207    | 0.9623     |
| 13   | 5.8903    | 5.4989    | 0.9605     |
| 14   | 5.7585    | 5.4681    | 0.9587     |
| 15   | 5.6358    | 5.3975    | 0.9608     |
| 16   | 5.6590    | 5.891     | 0.9539     |
| 17   | 5.7550    | 5.4654    | 0.9585     |
| 18   | 5.8413    | 5.3224    | 0.9624     |
| 19   | 6.0070    | 5.4397    | 0.9579     |
| 20   | 5.8478    | 5.3161    | 0.9608     |
| 21   | 5.7449    | 5.0797    | 0.9657     |
| 22   | 5.6083    | 5.0797    | 0.9657     |
| 23   | 5.7021    | 5.5592    | 0.9591     |
| 24   | 6.3217    | 5.5949    | 0.9557     |
| 25   | 5.9936    | 5.5113    | 0.9578     |
| 26   | 6.1687    | 5.705     | 0.9542     |
| 27   | 5.4529    | 4.7577    | 0.9689     |
| 28   | 5.8918    | 5.3009    | 0.9639     |
| 29   | 5.6110    | 5.1962    | 0.9644     |
| 30   | 5.9394    | 5.6935    | 0.9547     |
| avg. | 6.07±0.45 | 5.27±0.34 | 0.96±0.005 |

<sup>a</sup> The detail of canonical SMILES is provided in Section 3.2.

## Reaction-2

### 6. Enantioselective formation of N,S-acetals

#### 6.1 Summary of reactions

**Table S17.** Details of Reaction Components

| General Reaction Conditions |
|-----------------------------|
|                             |
| Reaction Components         |

|         |     |     |
|---------|-----|-----|
|         |     |     |
| Ligands |     |     |
|         |     |     |
| L1      | L2  | L3  |
|         |     |     |
| L4      | L5  | L6  |
|         |     |     |
| L7      | L8  | L9  |
|         |     |     |
| L10     | L11 | L12 |

|                                                                                                       |                                                                                                       |                                                                                                         |
|-------------------------------------------------------------------------------------------------------|-------------------------------------------------------------------------------------------------------|---------------------------------------------------------------------------------------------------------|
| <p><b>L10</b></p> 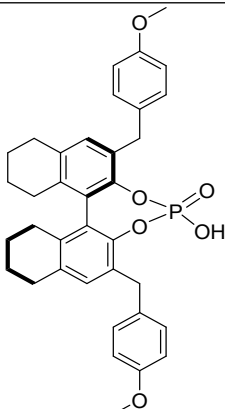   | <p><b>L11</b></p>    | <p><b>L12</b></p>    |
| <p><b>L13</b></p>    | <p><b>L14</b></p>    | <p><b>L15</b></p>    |
| <p><b>L16</b></p>  | <p><b>L17</b></p>  | <p><b>L18</b></p>  |
| <p><b>L19</b></p>  | <p><b>L20</b></p>  | <p><b>L21</b></p>  |
| <p><b>L22</b></p>  | <p><b>L23</b></p>  | <p><b>L24</b></p>  |

|                                                                                     |                                                                                     |                                                                                       |
|-------------------------------------------------------------------------------------|-------------------------------------------------------------------------------------|---------------------------------------------------------------------------------------|
| 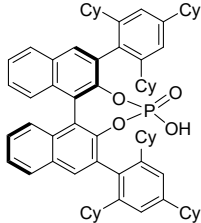   |    |    |
| <p><b>L25</b></p>                                                                   | <p><b>L26</b></p>                                                                   | <p><b>L27</b></p>                                                                     |
|    |    |    |
| <p><b>L28</b></p>                                                                   | <p><b>L29</b></p>                                                                   | <p><b>L30</b></p>                                                                     |
|   |   |   |
| <p><b>L31</b></p>                                                                   | <p><b>L32</b></p>                                                                   | <p><b>L33</b></p>                                                                     |
|  |  |  |
| <p><b>L34</b></p>                                                                   | <p><b>L35</b></p>                                                                   | <p><b>L36</b></p>                                                                     |
|  |  |  |
| <p><b>L37</b></p>                                                                   | <p><b>L38</b></p>                                                                   | <p><b>L39</b></p>                                                                     |

|            |            |            |           |           |
|------------|------------|------------|-----------|-----------|
|            |            |            |           |           |
| <b>L40</b> | <b>L41</b> | <b>L42</b> |           |           |
|            |            |            |           |           |
| <b>L43</b> |            |            |           |           |
| Imines     |            |            |           |           |
|            |            |            |           |           |
| <b>I1</b>  | <b>I2</b>  | <b>I3</b>  | <b>I4</b> | <b>I5</b> |
| Thiols     |            |            |           |           |
|            |            |            |           |           |
| <b>T1</b>  | <b>T2</b>  | <b>T3</b>  | <b>T4</b> | <b>T5</b> |

## 6.2 Target-task LM fine-tuning

The hyperparameter optimization is performed for fine-tuning the target-task LM. For this purpose, a randomized 80:20 train-test splits were used. The hyperparameters considered for fine-tuning the target-task LM are listed in Table S18. In addition, effect of different number of augmented SMILES is also considered. The model is evaluated using accuracy as the metric of performance, as compiled in Table S18.

**Table S18.** Hyperparameter Optimization for the Target-task LM Fine-tuning



| no. of augmented SMILES                | dropout_rate | epoch <sup>a</sup> | learning rate <sup>b</sup> | train_loss | val_loss | accuracy |
|----------------------------------------|--------------|--------------------|----------------------------|------------|----------|----------|
| varying the number of augmented SMILES |              |                    |                            |            |          |          |
| 0                                      | 0.0          | [5,5]              | [0.36, 0.01]               | 0.0946     | 0.1640   | 0.9500   |
| 25                                     | 0.0          | [5,5]              | [0.36, 0.01]               | 0.1541     | 0.1815   | 0.9228   |
| 50                                     | 0.0          | [5,5]              | [0.36, 0.01]               | 0.1558     | 0.1889   | 0.9215   |
| varying the dropout rate               |              |                    |                            |            |          |          |
| 0                                      | 0.0          | [5,5]              | [0.36, 0.01]               | 0.0946     | 0.1640   | 0.9500   |
| 0                                      | 0.1          | [5,5]              | [0.36, 0.01]               | 0.1302     | 0.1524   | 0.9537   |
| 0                                      | 0.2          | [5,5]              | [0.36, 0.01]               | 0.1261     | 0.1533   | 0.9535   |
| 0                                      | 0.3          | [5,5]              | [0.36, 0.01]               | 0.1261     | 0.1613   | 0.9510   |
| 0                                      | 0.4          | [5,5]              | [0.36, 0.01]               | 0.1334     | 0.1540   | 0.9528   |
| 0                                      | 0.5          | [5,5]              | [0.36, 0.01]               | 0.1322     | 0.1602   | 0.9503   |
| 0                                      | 0.6          | [5,5]              | [0.36, 0.01]               | 0.1414     | 0.1505   | 0.9525   |
| 0                                      | 0.7          | [5,5]              | [0.36, 0.01]               | 0.1451     | 0.1514   | 0.9535   |
| 0                                      | 0.8          | [5,5]              | [0.36, 0.01]               | 0.1645     | 0.1606   | 0.9502   |
| 0                                      | 0.9          | [5,5]              | [0.36, 0.01]               | 0.1796     | 0.1612   | 0.9493   |
| varying the number of epochs           |              |                    |                            |            |          |          |
| 0                                      | 0.2          | [5,5]              | [0.36, 0.01]               | 0.1261     | 0.1533   | 0.9535   |
| 0                                      | 0.2          | [4,4]              | [0.36, 0.01]               | 0.1538     | 0.1735   | 0.9490   |
| 0                                      | 0.2          | [4,5]              | [0.36, 0.01]               | 0.1396     | 0.1571   | 0.9531   |
| 0                                      | 0.2          | [5,6]              | [0.36, 0.01]               | 0.1065     | 0.1449   | 0.9540   |
| 0                                      | 0.2          | [6,6]              | [0.36, 0.01]               | 0.1133     | 0.1494   | 0.9525   |
| varying the learning rate              |              |                    |                            |            |          |          |
| 0                                      | 0.2          | [5,6]              | [0.36, 0.01]               | 0.1065     | 0.1449   | 0.9540   |
| 0                                      | 0.2          | [5,6]              | [1e-1, 1e-2]               | 0.0998     | 0.1463   | 0.9526   |
| 0                                      | 0.2          | [5,6]              | [1e-1, 1e-1]               | 1.6221     | 1.0114   | 0.6851   |
| 0                                      | 0.2          | [5,6]              | [1e-2, 1e-2]               | 0.1399     | 0.1515   | 0.9530   |
| 0                                      | 0.2          | [5,6]              | [1e-2, 1e-3]               | 0.2910     | 0.2517   | 0.9294   |
| 0                                      | 0.2          | [5,6]              | [1e-1, 1e-3]               | 0.1457     | 0.2011   | 0.9431   |

<sup>a</sup>For the first step, the weights of the LSTM layers are kept frozen and the rest of the model is trained. In the second step, all layers are unfrozen so that the LSTM layers can be fine-tuned. <sup>b</sup>The notations such as [5,5] correspond to the number of epochs in each step and [0.36, 0.01] are the respective learning rates. One hyperparameter is varied at a time keeping others constant. The red color values and the highlighted rows respectively represent the best hyperparameter and optimal combination of the hyperparameters.

These optimal hyperparameter combinations are considered for assessing the model performance on 10 independent runs consisting of randomly distributed samples between the train-test splits. The model performance provided in Table S19 is reported in terms of the commonly recommended matrices such as accuracy and perplexity. An average accuracy of ~95% over 10 runs could be obtained.

**Table S19.** The Calculated Train and Test Accuracies for the Target-task LM Using the Optimal Set of Hyperparameters

| sr. no. for runs     | train_loss | test_loss | accuracy      | perplexity    |
|----------------------|------------|-----------|---------------|---------------|
| 1                    | 0.1218     | 0.1546    | 0.9520        | 1.1671        |
| 2                    | 0.1124     | 0.1516    | 0.9542        | 1.1638        |
| 3                    | 0.1074     | 0.1506    | 0.9525        | 1.1625        |
| 4                    | 0.1168     | 0.1500    | 0.9538        | 1.1618        |
| 5                    | 0.1028     | 0.1470    | 0.9532        | 1.1584        |
| 6                    | 0.1090     | 0.1521    | 0.9514        | 1.1642        |
| 7                    | 0.1200     | 0.1545    | 0.9507        | 1.1671        |
| 8                    | 0.1279     | 0.1526    | 0.9524        | 1.1648        |
| 9                    | 0.1157     | 0.1541    | 0.9519        | 1.1666        |
| 10                   | 0.1036     | 0.1537    | 0.9522        | 1.1661        |
| average over 10 runs |            |           | 0.9524±0.0011 | 1.1642±0.0028 |

### 6.3 Target-task regressor fine-tuning

The hyperparameter optimization is performed for fine-tuning the target-task regressor. For this purpose, the full data is split into 70:10:20 train-validation-test sets. All the hyperparameters are tuned on the validation set. After hyperparameter tuning, the train and validation sets are merged for prediction on the test set. The models are evaluated using RMSE as the error metric (Table S20). In addition, the effect of SMILES augmentation with the inclusion of gaussian noise is also considered for optimization.

**Table S20.** Hyperparameter Optimization for the Target-task Regressor Fine-tuning

| No. of augmented SMILES                | $\sigma_{g\_noise}$ | dropout_rate | epoch <sup>a</sup> | learning_rate <sup>b</sup> | train_rmse | val_rmse |
|----------------------------------------|---------------------|--------------|--------------------|----------------------------|------------|----------|
| varying the number of augmented SMILES |                     |              |                    |                            |            |          |
| 0                                      | n.a                 | 0.0          | [5,6,6,6]          | [0.1,0.01,0.001,0.001]     | 11.6088    | 9.1313   |
| 5                                      | 0.0                 | 0.0          | [5,6,6,6]          | [0.1,0.01,0.001,0.001]     | 12.5853    | 9.4734   |
| 10                                     | 0.0                 | 0.0          | [5,6,6,6]          | [0.1,0.01,0.001,0.001]     | 12.7097    | 9.1135   |
| 20                                     | 0.0                 | 0.0          | [5,6,6,6]          | [0.1,0.01,0.001,0.001]     | 13.3047    | 8.4346   |
| 35                                     | 0.0                 | 0.0          | [5,6,6,6]          | [0.1,0.01,0.001,0.001]     | 15.1743    | 11.9265  |
| 50                                     | 0.0                 | 0.0          | [5,6,6,6]          | [0.1,0.01,0.001,0.001]     | 12.7090    | 9.3255   |
| [5,1] <sup>c</sup>                     | 0.0                 | 0.0          | [5,6,6,6]          | [0.1,0.01,0.001,0.001]     | 12.2330    | 14.2425  |

|                              |     |     |           |                           |         |         |
|------------------------------|-----|-----|-----------|---------------------------|---------|---------|
| [10,2]                       | 0.0 | 0.0 | [5,6,6,6] | [0.1,0.01,0.001,0.001]    | 12.2893 | 10.8678 |
| [15,3]                       | 0.0 | 0.0 | [5,6,6,6] | [0.1,0.01,0.001,0.001]    | 11.6116 | 9.8993  |
| [20,4]                       | 0.0 | 0.0 | [5,6,6,6] | [0.1,0.01,0.001,0.001]    | 11.8338 | 9.8108  |
| [25,5]                       | 0.0 | 0.0 | [5,6,6,6] | [0.1,0.01,0.001,0.001]    | 12.6045 | 10.0374 |
| [25,10]                      | 0.0 | 0.0 | [5,6,6,6] | [0.1,0.01,0.001,0.001]    | 12.7084 | 9.4539  |
| [30,10]                      | 0.0 | 0.0 | [5,6,6,6] | [0.1,0.01,0.001,0.001]    | 14.4477 | 8.3259  |
| [30,5]                       | 0.0 | 0.0 | [5,6,6,6] | [0.1,0.01,0.001,0.001]    | 11.9840 | 10.1298 |
| [40,10]                      | 0.0 | 0.0 | [5,6,6,6] | [0.1,0.01,0.001,0.001]    | 11.5660 | 10.8672 |
| [50,10]                      | 0.0 | 0.0 | [5,6,6,6] | [0.1,0.01,0.001,0.001]    | 10.4039 | 8.6911  |
| [60,10]                      | 0.0 | 0.0 | [5,6,6,6] | [0.1,0.01,0.001,0.001]    | 11.2207 | 11.4303 |
| [50,15]                      | 0.0 | 0.0 | [5,6,6,6] | [0.1,0.01,0.001,0.001]    | 11.1166 | 8.8644  |
| [75,15]                      | 0.0 | 0.0 | [5,6,6,6] | [0.1,0.01,0.001,0.001]    | 11.6366 | 10.1598 |
| varying the $\sigma_g$ noise |     |     |           |                           |         |         |
| [50,10]                      | 0.0 | 0.0 | [5,6,6,6] | [0.1,0.01,0.001,0.001]    | 10.4039 | 8.6911  |
| [50,10]                      | 0.1 | 0.0 | [5,6,6,6] | [0.1,0.01,0.001,0.001]    | 10.4053 | 8.7040  |
| [50,10]                      | 0.2 | 0.0 | [5,6,6,6] | [0.1,0.01,0.001,0.001]    | 10.4347 | 8.4499  |
| [50,10]                      | 0.3 | 0.0 | [5,6,6,6] | [0.1,0.01,0.001,0.001]    | 10.4226 | 8.4635  |
| [50,10]                      | 0.5 | 0.0 | [5,6,6,6] | [0.1,0.01,0.001,0.001]    | 10.4177 | 9.4609  |
| [50,10]                      | 0.7 | 0.0 | [5,6,6,6] | [0.1,0.01,0.001,0.001]    | 10.4181 | 9.5155  |
| varying the dropout rate     |     |     |           |                           |         |         |
| [50,10]                      | 0.3 | 0.0 | [5,6,6,6] | [0.1,0.01,0.001,0.001]    | 10.4226 | 8.4635  |
| [50,10]                      | 0.3 | 0.1 | [5,6,6,6] | [0.1,0.01,0.001,0.001]    | 10.8354 | 9.0548  |
| [50,10]                      | 0.3 | 0.2 | [5,6,6,6] | [0.1,0.01,0.001,0.001]    | 11.1981 | 10.0010 |
| [50,10]                      | 0.3 | 0.3 | [5,6,6,6] | [0.1,0.01,0.001,0.001]    | 11.5677 | 10.3461 |
| varying the number of epochs |     |     |           |                           |         |         |
| [50,10]                      | 0.3 | 0.0 | [5,5,5,5] | [0.1,0.01,0.001,0.001]    | 11.7875 | 8.4578  |
| [50,10]                      | 0.3 | 0.0 | [5,5,5,6] | [0.1,0.01,0.001,0.001]    | 10.4921 | 8.9741  |
| [50,10]                      | 0.3 | 0.0 | [5,5,6,6] | [0.1,0.01,0.001,0.001]    | 10.4651 | 8.9672  |
| [50,10]                      | 0.3 | 0.0 | [5,6,6,6] | [0.1,0.01,0.001,0.001]    | 10.4226 | 8.4635  |
| [50,10]                      | 0.3 | 0.0 | [6,6,6,6] | [0.1,0.01,0.001,0.001]    | 10.4764 | 9.8866  |
| varying the learning rate    |     |     |           |                           |         |         |
| [50,10]                      | 0.3 | 0.0 | [5,6,6,6] | [0.1,0.01,0.001,0.001]    | 10.4226 | 8.4635  |
| [50,10]                      | 0.3 | 0.0 | [5,6,6,6] | [0.001,0.001,0.001,0.001] | 10.5987 | 9.3813  |
| [50,10]                      | 0.3 | 0.0 | [5,6,6,6] | [0.1,0.01,0.001,0.0001]   | 10.5584 | 8.4069  |
| [50,10]                      | 0.3 | 0.0 | [5,6,6,6] | [0.1,0.01,0.01,0.001]     | 10.3653 | 9.5633  |
| [50,10]                      | 0.3 | 0.0 | [5,6,6,6] | [0.1,0.01,0.01,0.01]      | 10.7131 | 9.6090  |

<sup>a</sup>The regressor is fine-tuned using gradual unfreezing method in four steps: (i) the regressor, (ii) the regressor and the final LSTM layer, (iii) the regressor and the last two LSTM layers, and (iv) the full model. <sup>b</sup>A notations such as [5,6,6,6] and [0.1,0.01,0.001,0.001] respectively corresponds to the number of epochs used in each of these steps and the respective learning rates. The values shown in red color and the highlighted rows respectively represent the best hyperparameter and optimal combination of the hyperparameters. <sup>c</sup>A notation such as [n,m] refers to differential SMILES augmentation wherein the data with %ee  $\leq$  70 is augmented with [n] SMILES, while that with %ee  $>$  70 is augmented with [m] SMILES.

The same set of hyperparameters is used for fine-tuning the target-task regressor on both the general-domain and target-task LM. We have considered 80:20 train-test splits. The final performance is reported in terms of RMSE, obtained as the average over 30 independent runs on randomized splits of the data. The results for individual runs are shown in Tables S21. The performance in terms of mean absolute error (MAE) is also reported in Table S22. It is to be noted that the train-test splits for all models, **TL-m1/m2** (with and without gradual unfreezing) and **TL-m0** were maintained the same.

**Table S21.** Test and Train RMSEs in the Fine-tuning of the Target-task Regressor<sup>a</sup>

| sr. no.<br>for<br>runs | fine-tuning on general-domain LM |                          |                    | fine-tuning on target-task LM |                          |                    |
|------------------------|----------------------------------|--------------------------|--------------------|-------------------------------|--------------------------|--------------------|
|                        | train_RMSE                       | test_RMSE<br>(canonical) | test_RMSE<br>(TTA) | train_RMSE                    | test_RMSE<br>(canonical) | test_RMSE<br>(TTA) |
| 1                      | 10.8969                          | 7.6220                   | 7.8429             | 10.9327                       | 7.9736                   | 8.1443             |
| 2                      | 11.4193                          | 8.3091                   | 8.3280             | 11.4087                       | 9.0648                   | 8.2838             |
| 3                      | 10.2813                          | 11.5042                  | 11.7878            | 10.2634                       | 12.4362                  | 11.5708            |
| 4                      | 12.5235                          | 9.5899                   | 9.7144             | 12.4624                       | 8.7530                   | 8.4618             |
| 5                      | 11.7890                          | 8.0276                   | 8.4302             | 11.7831                       | 7.6025                   | 8.0163             |
| 6                      | 12.4842                          | 8.5522                   | 8.9259             | 12.4499                       | 8.6019                   | 8.6372             |
| 7                      | 10.4513                          | 8.2827                   | 7.9552             | 10.4934                       | 7.9420                   | 7.4382             |
| 8                      | 12.9043                          | 9.6445                   | 9.9700             | 12.9097                       | 9.3820                   | 9.7876             |
| 9                      | 11.4337                          | 8.4755                   | 9.1646             | 11.4744                       | 8.9630                   | 8.3900             |
| 10                     | 12.8760                          | 7.9736                   | 8.1443             | 12.9172                       | 8.4883                   | 8.4687             |
| 11                     | 13.4148                          | 8.7315                   | 9.1887             | 13.4408                       | 8.8211                   | 8.6722             |
| 12                     | 10.5204                          | 8.1384                   | 8.5928             | 10.5875                       | 8.8972                   | 8.5362             |
| 13                     | 10.8152                          | 8.7813                   | 8.3856             | 10.8929                       | 8.1786                   | 8.215              |
| 14                     | 11.3905                          | 10.0408                  | 9.8717             | 11.4167                       | 10.9905                  | 10.0316            |
| 15                     | 12.2543                          | 9.2219                   | 8.7812             | 12.2455                       | 9.1431                   | 8.8569             |
| 16                     | 10.9649                          | 8.8474                   | 8.5042             | 11.0534                       | 8.4428                   | 8.3032             |
| 17                     | 12.1229                          | 8.1797                   | 8.6658             | 12.1674                       | 10.0357                  | 8.9786             |
| 18                     | 11.8143                          | 7.7602                   | 7.4142             | 11.8375                       | 8.4599                   | 7.8503             |
| 19                     | 12.5671                          | 7.9418                   | 7.3004             | 12.6031                       | 7.9604                   | 7.4808             |
| 20                     | 10.0408                          | 9.0474                   | 9.0732             | 10.1054                       | 10.2004                  | 9.2589             |
| 21                     | 13.5604                          | 8.9457                   | 9.1877             | 13.5303                       | 9.0303                   | 9.2041             |
| 22                     | 11.4916                          | 9.1867                   | 9.8506             | 11.4834                       | 8.3005                   | 8.5987             |
| 23                     | 10.9593                          | 7.9320                   | 7.8641             | 10.9907                       | 7.8052                   | 7.7039             |
| 24                     | 11.2306                          | 8.6090                   | 8.7527             | 11.2829                       | 9.0837                   | 9.0468             |
| 25                     | 10.7972                          | 9.3635                   | 10.3277            | 10.8064                       | 10.0026                  | 10.3337            |
| 26                     | 10.9956                          | 11.1551                  | 11.5735            | 11.0043                       | 11.7584                  | 11.502             |

|      |            |           |           |            |           |           |
|------|------------|-----------|-----------|------------|-----------|-----------|
| 27   | 10.6359    | 8.7473    | 9.2161    | 10.6643    | 9.2188    | 9.3065    |
| 28   | 11.5866    | 8.6359    | 8.5913    | 11.6264    | 9.6789    | 8.788     |
| 29   | 10.9376    | 8.5583    | 9.2763    | 10.9889    | 8.0363    | 8.2595    |
| 30   | 10.2055    | 10.6959   | 10.3535   | 10.2302    | 9.9971    | 10.2149   |
| avg. | 11.51±0.96 | 8.88±0.96 | 9.03±1.07 | 11.54±0.95 | 9.11±1.15 | 8.88±1.03 |

<sup>a</sup>The detail on the canonical and TTA SMILES is provided in Section 3.2.

**Table S22.** Test MAEs in the Fine-tuning of the Target-task Regressor<sup>a</sup>

| sr. no.<br>for runs | fine-tuning on general-domain LM |                   | fine-tuning on target-task LM |                   |
|---------------------|----------------------------------|-------------------|-------------------------------|-------------------|
|                     | test_MAE<br>(canonical)          | test_MAE<br>(TTA) | test_MAE<br>(canonical)       | test_MAE<br>(TTA) |
| 1                   | 5.6329                           | 5.9930            | 6.0960                        | 5.9121            |
| 2                   | 5.8218                           | 6.2429            | 6.4515                        | 6.1769            |
| 3                   | 8.6536                           | 8.9981            | 9.7720                        | 9.0147            |
| 4                   | 7.4414                           | 7.6737            | 6.3012                        | 6.1703            |
| 5                   | 6.1805                           | 6.3553            | 5.8992                        | 5.9996            |
| 6                   | 6.6447                           | 6.7288            | 6.5335                        | 6.4401            |
| 7                   | 6.1748                           | 6.0865            | 6.0802                        | 5.628             |
| 8                   | 7.0231                           | 7.7940            | 6.9338                        | 7.6341            |
| 9                   | 5.9697                           | 6.8378            | 6.6345                        | 6.2840            |
| 10                  | 6.0960                           | 5.9121            | 6.2775                        | 6.2262            |
| avg.                | 6.56±0.92                        | 6.86±1.00         | 6.70±1.12                     | 6.55±1.02         |

<sup>a</sup>The detail on the canonical and TTA SMILES is provided in Section 3.2.

## 6.4 Training the target-task regressor from scratch

In order to assess the impact of transfer learning, the target-task regressor is trained from scratch.

The hyperparameters are tuned separately, details of which are given in Table S23.

**Table S23.** Hyperparameter Optimization for Training the Target-task Regressor from Scratch<sup>a</sup>

| No. of<br>augmented<br>SMILES          | $\sigma_{g\_noise}$ | dropout_rate | epoch | learning<br>rate | train_rmse | val_rmse |
|----------------------------------------|---------------------|--------------|-------|------------------|------------|----------|
| varying the number of augmented SMILES |                     |              |       |                  |            |          |
| 0                                      | na                  | 0.0          | 10    | 0.001            | 65.8805    | 64.2196  |
| 25                                     | 0.0                 | 0.0          | 10    | 0.001            | 31.0083    | 28.9158  |
| 50                                     | 0.0                 | 0.0          | 10    | 0.001            | 14.5160    | 9.6663   |
| 75                                     | 0.0                 | 0.0          | 10    | 0.001            | 11.3552    | 8.5079   |
| 100                                    | 0.0                 | 0.0          | 10    | 0.001            | 12.0342    | 8.6412   |
| varying the $\sigma_{g\_noise}$        |                     |              |       |                  |            |          |
| 75                                     | 0.0                 | 0.0          | 10    | 0.001            | 11.3552    | 8.5079   |
| 75                                     | 0.2                 | 0.0          | 10    | 0.001            | 17.3483    | 25.1794  |
| 75                                     | 0.4                 | 0.0          | 10    | 0.001            | 11.2871    | 9.1283   |

|                              |     |     |    |       |         |         |
|------------------------------|-----|-----|----|-------|---------|---------|
| 75                           | 0.6 | 0.0 | 10 | 0.001 | 11.2255 | 8.8158  |
| varying the dropout rate     |     |     |    |       |         |         |
| 75                           | 0.0 | 0.0 | 10 | 0.001 | 11.3552 | 8.5079  |
| 75                           | 0.0 | 0.1 | 10 | 0.001 | 11.1855 | 8.6451  |
| 75                           | 0.0 | 0.2 | 10 | 0.001 | 11.3013 | 8.9785  |
| 75                           | 0.0 | 0.3 | 10 | 0.001 | 11.2939 | 9.5520  |
| varying the learning rate    |     |     |    |       |         |         |
| 75                           | 0.0 | 0.0 | 10 | 0.001 | 11.3552 | 8.5079  |
| 75                           | 0.0 | 0.0 | 10 | 0.01  | 12.1813 | 10.1768 |
| varying the number of epochs |     |     |    |       |         |         |
| 75                           | 0.0 | 0.0 | 10 | 0.001 | 11.3552 | 8.5079  |
| 75                           | 0.0 | 0.0 | 15 | 0.001 | 12.5023 | 8.9775  |

<sup>a</sup>The values shown in red color and the highlighted rows respectively represent the best hyperparameter and optimal combination of the hyperparameters.

The calculations are performed on randomized 80:20 train-test splits. The final performance is reported in terms of RMSE and MAE as the average over 30 independent runs on a randomized distribution of samples across test-train splits. The results are shown in Table S24.

**Table S24.** Test and Train RMSEs for the Training of Target-task Regressor<sup>a</sup>

| sr. no. for runs | train_RMSE | test_RMSE (canonical) | test_RMSE (TTA) |
|------------------|------------|-----------------------|-----------------|
| 1                | 12.8888    | 10.1427               | 8.0141          |
| 2                | 12.5814    | 10.1091               | 7.8643          |
| 3                | 12.0354    | 10.9098               | 9.2555          |
| 4                | 12.5718    | 11.2784               | 10.4672         |
| 5                | 12.9339    | 9.3306                | 8.3209          |
| 6                | 12.7063    | 11.8261               | 9.8482          |
| 7                | 12.7670    | 11.0132               | 9.4511          |
| 8                | 12.5649    | 10.4499               | 9.2576          |
| 9                | 13.4493    | 11.309                | 9.2871          |
| 10               | 13.1673    | 9.1956                | 8.0819          |
| 11               | 12.2905    | 14.5161               | 12.2967         |
| 12               | 12.3890    | 10.7085               | 9.1438          |
| 13               | 13.0849    | 10.9115               | 9.4615          |
| 14               | 12.3712    | 12.7057               | 11.1367         |
| 15               | 12.7934    | 17.5182               | 16.4749         |
| 16               | 12.7762    | 12.316                | 10.679          |
| 17               | 12.4515    | 12.8179               | 10.4797         |
| 18               | 12.5317    | 12.9491               | 9.6972          |
| 19               | 12.9354    | 10.0093               | 8.4564          |
| 20               | 12.4512    | 12.6905               | 10.9547         |

|      |            |            |            |
|------|------------|------------|------------|
| 21   | 12.7782    | 11.5631    | 10.3913    |
| 22   | 12.3783    | 11.8993    | 8.8372     |
| 23   | 12.8857    | 11.8810    | 9.4376     |
| 24   | 13.1704    | 12.5464    | 10.8570    |
| 25   | 12.4322    | 11.4361    | 10.0360    |
| 26   | 13.0497    | 11.7193    | 11.0650    |
| 27   | 12.6859    | 14.8841    | 12.1206    |
| 28   | 12.2237    | 10.2464    | 8.8790     |
| 29   | 13.0103    | 12.1166    | 10.1826    |
| 30   | 12.9494    | 13.8904    | 12.2743    |
| avg. | 12.71±0.32 | 11.83±1.75 | 10.09±1.71 |

<sup>a</sup>The detail on the canonical and TTA SMILES is provided in Section 3.2.

## 6.5 Y-randomization

With the randomized target values, the regressor is fine-tuned on the general-domain LM. The results for are shown in Table S25. The test and train RMSEs are found to be much inferior as compared to when the original/true output values were used.

**Table S25.** Test and Train RMSEs for the Training of the Target-task Regressor on 80:20 Train-test Splits in y-Randomization Runs<sup>a</sup>

| sr. no.<br>for<br>runs | train_RMSE | test_RMSE<br>(canonical) | test_RMSE<br>(TTA) |
|------------------------|------------|--------------------------|--------------------|
| 1                      | 10.2648    | 32.5373                  | 32.7839            |
| 2                      | 11.3377    | 28.3143                  | 29.6992            |
| 3                      | 11.2058    | 31.4305                  | 31.5316            |
| 4                      | 11.0272    | 32.2311                  | 32.5435            |
| 5                      | 11.2274    | 31.4421                  | 31.8015            |
| 6                      | 11.4057    | 33.4081                  | 31.9833            |
| 7                      | 11.1125    | 33.0163                  | 33.1351            |
| 8                      | 11.2239    | 33.3241                  | 32.9844            |
| 9                      | 10.9392    | 31.7564                  | 32.8172            |
| 10                     | 11.3970    | 33.7541                  | 34.6366            |
| avg.                   | 11.11±0.33 | 32.12±1.57               | 32.39±1.28         |

<sup>a</sup>The detail on the canonical and TTA SMILES is provided in Section 3.2.

## 6.6 Target-task regressor fine-tuning without gradual unfreezing and with a constant learning rate

The hyperparameter optimization is performed for fine-tuning the target-task regressor. For this purpose, the full data is split into 70:10:20 train-validation-test sets. All the hyperparameters are tuned on the validation set. After the hyperparameter tuning, the train and validation sets are merged for prediction on the test set. The models are evaluated using root mean square error (RMSE) as the error metric (Table S26).

**Table S26.** Hyperparameter Optimization for Fine-tuning the Target-task Regressor Without Gradual Unfreezing<sup>a</sup>

| No. of augmented SMILES                | $\sigma_{g\_noise}$ | dropout_rate | epoch | learning rate | train_rmse | val_rmse |
|----------------------------------------|---------------------|--------------|-------|---------------|------------|----------|
| varying the number of augmented SMILES |                     |              |       |               |            |          |
| 0                                      | na                  | 0.0          | 10    | 0.001         | 66.7008    | 64.4411  |
| 25                                     | 0.0                 | 0.0          | 10    | 0.001         | 31.3662    | 25.9997  |
| 50                                     | 0.0                 | 0.0          | 10    | 0.001         | 13.8926    | 8.1117   |
| 75                                     | 0.0                 | 0.0          | 10    | 0.001         | 12.2005    | 8.6147   |
| 100                                    | 0.0                 | 0.0          | 10    | 0.001         | 12.3863    | 8.3888   |
| varying the $\sigma_{g\_noise}$        |                     |              |       |               |            |          |
| 75                                     | 0.2                 | 0.0          | 10    | 0.001         | 12.2440    | 8.4933   |
| 75                                     | 0.4                 | 0.0          | 10    | 0.001         | 12.1680    | 8.5478   |
| 75                                     | 0.6                 | 0.0          | 10    | 0.001         | 12.2455    | 8.4124   |
| 75                                     | 0.8                 | 0.0          | 10    | 0.001         | 12.2728    | 8.1331   |
| varying the dropout rate               |                     |              |       |               |            |          |
| 75                                     | 0.8                 | 0.0          | 10    | 0.001         | 12.2728    | 8.1331   |
| 75                                     | 0.8                 | 0.1          | 10    | 0.001         | 12.5504    | 8.2329   |
| 75                                     | 0.8                 | 0.2          | 10    | 0.001         | 12.7164    | 7.7244   |
| varying the number of epochs           |                     |              |       |               |            |          |
| 75                                     | 0.8                 | 0.0          | 10    | 0.001         | 12.2728    | 8.1331   |
| 75                                     | 0.8                 | 0.0          | 15    | 0.001         | 13.6039    | 7.7908   |
| 75                                     | 0.8                 | 0.0          | 20    | 0.001         | 13.1415    | 8.0967   |

<sup>a</sup>The values shown in red color and the highlighted rows respectively represent the best hyperparameter and optimal combination of the hyperparameters.

The final performance is reported in terms of RMSE obtained as the average over 30 independent runs on randomized splits of the data. The results are compiled in Table S27.

**Table S27.** Test and Train RMSEs for the Training of Target-task Regressor on 80:20 Train-test Splits<sup>a</sup>



| sr.<br>no.<br>for<br>runs | fine-tuning on general-domain LM |                          |                    | fine-tuning on target-task LM |                          |                    |
|---------------------------|----------------------------------|--------------------------|--------------------|-------------------------------|--------------------------|--------------------|
|                           | train_RMSE                       | test_RMSE<br>(canonical) | test_RMSE<br>(TTA) | train_RMSE                    | test_RMSE<br>(canonical) | test_RMSE<br>(TTA) |
| 1                         | 12.2091                          | 7.9266                   | 7.2346             | 12.2634                       | 8.2011                   | 7.9164             |
| 2                         | 11.9734                          | 7.9488                   | 8.1814             | 11.9803                       | 8.2714                   | 8.6470             |
| 3                         | 11.9175                          | 9.8675                   | 9.5886             | 11.9509                       | 10.1322                  | 9.6454             |
| 4                         | 12.0145                          | 8.2484                   | 8.4984             | 12.0677                       | 9.0014                   | 8.7950             |
| 5                         | 12.1635                          | 7.7455                   | 7.5260             | 12.2328                       | 7.9868                   | 8.0269             |
| 6                         | 12.0559                          | 9.1911                   | 8.4049             | 12.0527                       | 9.5428                   | 9.4087             |
| 7                         | 12.0410                          | 9.4401                   | 9.2092             | 12.0715                       | 8.9392                   | 8.9163             |
| 8                         | 11.7743                          | 8.9457                   | 8.4240             | 11.8314                       | 8.9550                   | 8.8065             |
| 9                         | 12.7562                          | 7.2064                   | 7.4976             | 12.7981                       | 7.8450                   | 7.8081             |
| 10                        | 12.5685                          | 7.7330                   | 7.7639             | 12.5821                       | 7.8648                   | 7.7324             |
| 11                        | 11.6808                          | 9.1931                   | 9.2079             | 11.7781                       | 9.2996                   | 9.5462             |
| 12                        | 11.8210                          | 8.3535                   | 8.3877             | 11.7423                       | 7.9743                   | 8.2870             |
| 13                        | 12.3879                          | 9.0628                   | 9.0958             | 12.4483                       | 8.6132                   | 8.8138             |
| 14                        | 11.8599                          | 9.6522                   | 9.8919             | 11.9398                       | 9.1257                   | 9.3553             |
| 15                        | 12.2167                          | 9.1398                   | 9.1603             | 12.1851                       | 8.8423                   | 8.8890             |
| 16                        | 12.1004                          | 8.7654                   | 8.3788             | 12.1580                       | 8.4331                   | 8.3530             |
| 17                        | 11.7919                          | 9.1034                   | 8.9343             | 11.8025                       | 8.4948                   | 8.3010             |
| 18                        | 11.7502                          | 8.4152                   | 8.0256             | 11.7687                       | 8.1299                   | 8.2299             |
| 19                        | 12.2091                          | 8.5902                   | 7.9692             | 12.2552                       | 7.6532                   | 7.5910             |
| 20                        | 11.8720                          | 7.2482                   | 7.2482             | 11.8781                       | 8.1642                   | 7.9874             |
| 21                        | 11.9459                          | 9.8768                   | 8.9874             | 11.9593                       | 9.1635                   | 8.9013             |
| 22                        | 11.5858                          | 7.2692                   | 6.8580             | 11.6670                       | 7.3880                   | 7.4826             |
| 23                        | 12.1025                          | 8.2311                   | 8.1505             | 12.1868                       | 8.4504                   | 8.3546             |
| 24                        | 12.6071                          | 8.8784                   | 8.7314             | 12.1868                       | 8.3910                   | 9.0997             |
| 25                        | 11.7280                          | 9.2542                   | 9.5449             | 11.8053                       | 9.4989                   | 9.7754             |
| 26                        | 12.4865                          | 9.6657                   | 9.7561             | 12.4650                       | 9.9115                   | 10.0197            |
| 27                        | 11.9653                          | 8.1941                   | 8.3417             | 11.8939                       | 8.1557                   | 8.1450             |
| 28                        | 11.5001                          | 8.0005                   | 7.8504             | 11.7423                       | 8.0908                   | 8.1321             |
| 29                        | 12.2241                          | 8.3971                   | 8.8237             | 12.2561                       | 8.9865                   | 8.8836             |
| 30                        | 12.1439                          | 9.8149                   | 9.1986             | 12.2069                       | 8.8589                   | 8.5880             |
| avg.                      | 12.05±0.30                       | 8.65±0.80                | 8.50±0.79          | 12.07±0.27                    | 8.61±0.67                | 8.61±0.67          |

<sup>a</sup>The detail on the canonical and TTA SMILES is provided in Section 3.2.

## Reaction-3

### 7. Asymmetric hydrogenation of alkenes and imines

#### 7.1 Summary of reactions

**Table S28.** Details of Reaction Components

| General Reaction Conditions                                                                                                                                                                                                                                                                                                                                                                                                                                                                                                                                                                                                                                                                     |            |            |            |
|-------------------------------------------------------------------------------------------------------------------------------------------------------------------------------------------------------------------------------------------------------------------------------------------------------------------------------------------------------------------------------------------------------------------------------------------------------------------------------------------------------------------------------------------------------------------------------------------------------------------------------------------------------------------------------------------------|------------|------------|------------|
| $  \begin{array}{c}  \text{R}_3 \\  \diagup \\  \text{N}=\text{C} \\  \diagdown \\  \text{R}_1  \end{array}  \text{R}_2  \quad \text{or} \quad  \begin{array}{c}  \text{R}_3 \\  \diagup \\  \text{C}=\text{C} \\  \diagdown \\  \text{R}_1  \end{array}  \text{R}_2  \xrightarrow[\text{H}_2]{\text{catalyst solvent}}  \begin{array}{c}  \text{R}_3 \\    \\  \text{HN} \\    \\  \text{R}_1  \end{array}  \begin{array}{c}  \text{R}_2 \\    \\  \text{H}  \end{array}  \quad \text{or} \quad  \begin{array}{c}  \text{R}_3 \\    \\  \text{H} \\    \\  \text{R}_4  \end{array}  \begin{array}{c}  \text{R}_2 \\    \\  \text{H}  \end{array}  \begin{array}{c}  \text{R}_1  \end{array}  $ |            |            |            |
| Reaction Components                                                                                                                                                                                                                                                                                                                                                                                                                                                                                                                                                                                                                                                                             |            |            |            |
| Ligands                                                                                                                                                                                                                                                                                                                                                                                                                                                                                                                                                                                                                                                                                         |            |            |            |
|                                                                                                                                                                                                                                                                                                                                                                                                                                                                                                                                                                                                                                                                                                 |            |            |            |
| <b>L1</b>                                                                                                                                                                                                                                                                                                                                                                                                                                                                                                                                                                                                                                                                                       | <b>L2</b>  | <b>L3</b>  | <b>L4</b>  |
|                                                                                                                                                                                                                                                                                                                                                                                                                                                                                                                                                                                                                                                                                                 |            |            |            |
| <b>L5</b>                                                                                                                                                                                                                                                                                                                                                                                                                                                                                                                                                                                                                                                                                       | <b>L6</b>  | <b>L7</b>  | <b>L8</b>  |
|                                                                                                                                                                                                                                                                                                                                                                                                                                                                                                                                                                                                                                                                                                 |            |            |            |
| <b>L9</b>                                                                                                                                                                                                                                                                                                                                                                                                                                                                                                                                                                                                                                                                                       | <b>L10</b> | <b>L11</b> | <b>L12</b> |
|                                                                                                                                                                                                                                                                                                                                                                                                                                                                                                                                                                                                                                                                                                 |            |            |            |
| <b>L13</b>                                                                                                                                                                                                                                                                                                                                                                                                                                                                                                                                                                                                                                                                                      | <b>L14</b> | <b>L15</b> | <b>L16</b> |
|                                                                                                                                                                                                                                                                                                                                                                                                                                                                                                                                                                                                                                                                                                 |            |            |            |
| <b>L17</b>                                                                                                                                                                                                                                                                                                                                                                                                                                                                                                                                                                                                                                                                                      | <b>L18</b> | <b>L19</b> | <b>L20</b> |
|                                                                                                                                                                                                                                                                                                                                                                                                                                                                                                                                                                                                                                                                                                 |            |            |            |
| <b>L21</b>                                                                                                                                                                                                                                                                                                                                                                                                                                                                                                                                                                                                                                                                                      | <b>L22</b> | <b>L23</b> | <b>L24</b> |
|                                                                                                                                                                                                                                                                                                                                                                                                                                                                                                                                                                                                                                                                                                 |            |            |            |
| <b>L25</b>                                                                                                                                                                                                                                                                                                                                                                                                                                                                                                                                                                                                                                                                                      | <b>L26</b> | <b>L27</b> | <b>L28</b> |

|            |            |            |            |
|------------|------------|------------|------------|
|            |            |            |            |
| <b>L29</b> | <b>L30</b> | <b>L31</b> | <b>L32</b> |
|            |            |            |            |
| <b>L33</b> | <b>L34</b> | <b>L35</b> | <b>L36</b> |
|            |            |            |            |
| <b>L37</b> | <b>L38</b> | <b>L39</b> | <b>L40</b> |
|            |            |            |            |
| <b>L41</b> | <b>L42</b> | <b>L43</b> | <b>L44</b> |
|            |            |            |            |
| <b>L45</b> | <b>L46</b> | <b>L47</b> | <b>L48</b> |
|            |            |            |            |
| <b>L49</b> | <b>L50</b> | <b>L51</b> | <b>L52</b> |

|            |            |            |            |
|------------|------------|------------|------------|
|            |            |            |            |
| <b>L53</b> | <b>L54</b> | <b>L55</b> | <b>L56</b> |
|            |            |            |            |
| <b>L57</b> |            | <b>L58</b> |            |
| Substrates |            |            |            |
|            |            |            |            |
| <b>S1</b>  | <b>S2</b>  | <b>S3</b>  | <b>S4</b>  |
|            |            |            |            |
| <b>S5</b>  | <b>S6</b>  | <b>S7</b>  | <b>S8</b>  |
|            |            |            |            |
| <b>S9</b>  | <b>S10</b> | <b>S11</b> | <b>S12</b> |
|            |            |            |            |
| <b>S13</b> | <b>S14</b> | <b>S15</b> | <b>S16</b> |
|            |            |            |            |
| <b>S17</b> | <b>S18</b> | <b>S19</b> | <b>S20</b> |

|            |            |            |            |
|------------|------------|------------|------------|
|            |            |            |            |
| <b>S21</b> | <b>S22</b> | <b>S23</b> | <b>S24</b> |
|            |            |            |            |
| <b>S25</b> | <b>S26</b> | <b>S27</b> | <b>S28</b> |
|            |            |            |            |
| <b>S29</b> | <b>S30</b> | <b>S31</b> | <b>S32</b> |
|            |            |            |            |
| <b>S33</b> | <b>S34</b> | <b>S35</b> | <b>S36</b> |
|            |            |            |            |
| <b>S37</b> | <b>S38</b> | <b>S39</b> | <b>S40</b> |
|            |            |            |            |
| <b>S41</b> | <b>S42</b> | <b>S43</b> | <b>S44</b> |
|            |            |            |            |
| <b>S45</b> | <b>S46</b> | <b>S47</b> | <b>S48</b> |
|            |            |            |            |
| <b>S49</b> | <b>S50</b> | <b>S51</b> | <b>S52</b> |

|                                                                                     |                                                                                     |                                                                                      |                                                                                       |
|-------------------------------------------------------------------------------------|-------------------------------------------------------------------------------------|--------------------------------------------------------------------------------------|---------------------------------------------------------------------------------------|
| 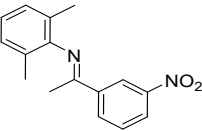   |    |    |    |
| <b>S53</b>                                                                          | <b>S54</b>                                                                          | <b>S55</b>                                                                           | <b>S56</b>                                                                            |
|    |    |    |    |
| <b>S57</b>                                                                          | <b>S58</b>                                                                          | <b>S59</b>                                                                           | <b>S60</b>                                                                            |
|    |    |    |    |
| <b>S61</b>                                                                          | <b>S62</b>                                                                          | <b>S63</b>                                                                           | <b>S64</b>                                                                            |
|    |    |    |    |
| <b>S65</b>                                                                          | <b>S66</b>                                                                          | <b>S67</b>                                                                           | <b>S68</b>                                                                            |
|    |    |    |    |
| <b>S69</b>                                                                          | <b>S70</b>                                                                          | <b>S71</b>                                                                           | <b>S72</b>                                                                            |
|   |   |   |   |
| <b>S73</b>                                                                          | <b>S74</b>                                                                          | <b>S75</b>                                                                           | <b>S76</b>                                                                            |
|  |  |  |  |
| <b>S77</b>                                                                          | <b>S78</b>                                                                          | <b>S79</b>                                                                           | <b>S80</b>                                                                            |
|  |  |  |  |
| <b>S81</b>                                                                          | <b>S82</b>                                                                          | <b>S83</b>                                                                           | <b>S84</b>                                                                            |
|  |  |  |  |
| <b>S85</b>                                                                          | <b>S86</b>                                                                          | <b>S87</b>                                                                           | <b>S88</b>                                                                            |
|  |  |  |  |
| <b>S89</b>                                                                          | <b>S90</b>                                                                          | <b>S91</b>                                                                           | <b>S92</b>                                                                            |
|  |  |  |  |
| <b>S93</b>                                                                          | <b>S94</b>                                                                          | <b>S95</b>                                                                           | <b>S96</b>                                                                            |

|                                                                                     |                                                                                     |                                                                                      |                                                                                       |
|-------------------------------------------------------------------------------------|-------------------------------------------------------------------------------------|--------------------------------------------------------------------------------------|---------------------------------------------------------------------------------------|
| 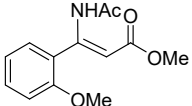   |    |    |    |
| <b>S97</b>                                                                          | <b>S98</b>                                                                          | <b>S99</b>                                                                           | <b>S100</b>                                                                           |
|    |    |    |    |
| <b>S101</b>                                                                         | <b>S102</b>                                                                         | <b>S103</b>                                                                          | <b>S104</b>                                                                           |
|    |    |    |    |
| <b>S105</b>                                                                         | <b>S106</b>                                                                         | <b>S107</b>                                                                          | <b>S108</b>                                                                           |
|    |    |    |    |
| <b>S109</b>                                                                         | <b>S110</b>                                                                         | <b>S111</b>                                                                          | <b>S112</b>                                                                           |
|   |   |   |   |
| <b>S113</b>                                                                         | <b>S114</b>                                                                         | <b>S115</b>                                                                          | <b>S116</b>                                                                           |
|  |  |  |  |
| <b>S117</b>                                                                         | <b>S118</b>                                                                         | <b>S119</b>                                                                          | <b>S120</b>                                                                           |
|  |  |  |  |
| <b>S121</b>                                                                         | <b>S122</b>                                                                         | <b>S123</b>                                                                          | <b>S124</b>                                                                           |
|  |  |  |  |
| <b>S125</b>                                                                         | <b>S126</b>                                                                         | <b>S127</b>                                                                          | <b>S128</b>                                                                           |
|  |  |  |  |
| <b>S129</b>                                                                         | <b>S130</b>                                                                         | <b>S131</b>                                                                          | <b>S132</b>                                                                           |

|             |             |             |             |
|-------------|-------------|-------------|-------------|
|             |             |             |             |
| <b>S133</b> | <b>S134</b> | <b>S135</b> | <b>S136</b> |
|             |             |             |             |
| <b>S137</b> | <b>S138</b> | <b>S139</b> | <b>S140</b> |
|             |             |             |             |
| <b>S141</b> | <b>S142</b> | <b>S143</b> | <b>S144</b> |
|             |             |             |             |
| <b>S145</b> | <b>S146</b> | <b>S147</b> | <b>S148</b> |
|             |             |             |             |
| <b>S149</b> | <b>S150</b> | <b>S151</b> | <b>S152</b> |
|             |             |             |             |
| <b>S153</b> | <b>S154</b> | <b>S155</b> | <b>S156</b> |
|             |             |             |             |
| <b>S157</b> | <b>S158</b> | <b>S159</b> | <b>S160</b> |
|             |             |             |             |
| <b>S161</b> | <b>S162</b> | <b>S163</b> | <b>S164</b> |
|             |             |             |             |
| <b>S165</b> | <b>S166</b> | <b>S167</b> | <b>S168</b> |



|                                                                                     |                                                                                   |                                                                                       |                                                                                     |
|-------------------------------------------------------------------------------------|-----------------------------------------------------------------------------------|---------------------------------------------------------------------------------------|-------------------------------------------------------------------------------------|
| 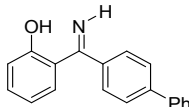   |  |     |  |
| <b>S169</b>                                                                         | <b>S170</b>                                                                       | <b>S171</b>                                                                           | <b>S172</b>                                                                         |
|    |  |     |  |
| <b>S173</b>                                                                         | <b>S174</b>                                                                       | <b>S175</b>                                                                           | <b>S176</b>                                                                         |
|    |  |     |  |
| <b>S177</b>                                                                         | <b>S178</b>                                                                       | <b>S179</b>                                                                           | <b>S180</b>                                                                         |
|    |  |     |  |
| <b>S181</b>                                                                         | <b>S182</b>                                                                       | <b>S183</b>                                                                           | <b>S184</b>                                                                         |
|    |  |     |  |
| <b>S185</b>                                                                         | <b>S186</b>                                                                       | <b>S187</b>                                                                           | <b>S188</b>                                                                         |
|  |                                                                                   |  |                                                                                     |
| <b>S189</b>                                                                         |                                                                                   | <b>S190</b>                                                                           |                                                                                     |
| Solvents                                                                            |                                                                                   |                                                                                       |                                                                                     |
| MeOH                                                                                | EtOH                                                                              | toluene                                                                               | <i>m</i> -xylene                                                                    |
| DCM                                                                                 | THF                                                                               | benzene                                                                               | acetonitrile                                                                        |
| methyl tert-butyl ether                                                             | CHCl <sub>3</sub>                                                                 | EtOAc                                                                                 | acetone                                                                             |

## 7.2 Target-task LM fine-tuning

The hyperparameter optimization is performed for fine-tuning the target-task LM. For this purpose, a randomized 80:20 train-test splits were used. The hyperparameters considered for fine-tuning the target-task LM are listed in Table S29. In addition, effect of different number of augmented SMILES is also considered. The model is evaluated using accuracy as the error metric, as compiled in Table S30.

**Table S29.** Hyperparameter Optimization for the Target-task LM Fine-tuning

| no. of augmented SMILES                | dropout_rate | epoch <sup>a</sup> | learning rate <sup>b</sup> | train_loss | val_loss | accuracy |
|----------------------------------------|--------------|--------------------|----------------------------|------------|----------|----------|
| varying the number of augmented SMILES |              |                    |                            |            |          |          |
| 0                                      | 0.0          | [5,5]              | [0.25, 0.01]               | 0.2594     | 0.5005   | 0.8760   |
| 25                                     | 0.0          | [5,5]              | [0.25, 0.01]               | 0.1817     | 0.3524   | 0.8845   |
| 50                                     | 0.0          | [5,5]              | [0.25, 0.01]               | 0.1775     | 0.3523   | 0.8858   |
| 75                                     | 0.0          | [5,5]              | [0.25, 0.01]               | 0.1792     | 0.3646   | 0.8859   |
| varying the dropout rate               |              |                    |                            |            |          |          |
| 25                                     | 0.0          | [5,5]              | [0.25, 0.01]               | 0.1817     | 0.3524   | 0.8845   |
| 25                                     | 0.1          | [5,5]              | [0.25, 0.01]               | 0.1978     | 0.3356   | 0.8862   |
| 25                                     | 0.2          | [5,5]              | [0.25, 0.01]               | 0.2008     | 0.3289   | 0.8858   |
| 25                                     | 0.3          | [5,5]              | [0.25, 0.01]               | 0.2081     | 0.3245   | 0.8870   |
| 25                                     | 0.4          | [5,5]              | [0.25, 0.01]               | 0.2140     | 0.3370   | 0.8838   |
| 25                                     | 0.5          | [5,5]              | [0.25, 0.01]               | 0.2132     | 0.3234   | 0.8867   |
| 25                                     | 0.6          | [5,5]              | [0.25, 0.01]               | 0.2185     | 0.3280   | 0.8852   |
| varying the number of epochs           |              |                    |                            |            |          |          |
| 25                                     | 0.5          | [5,5]              | [0.25, 0.01]               | 0.2132     | 0.3234   | 0.8867   |
| 25                                     | 0.5          | [4,4]              | [0.25, 0.01]               | 0.2165     | 0.3292   | 0.8850   |
| 25                                     | 0.5          | [4,5]              | [0.25, 0.01]               | 0.2131     | 0.3221   | 0.8865   |
| 25                                     | 0.5          | [5,6]              | [0.25, 0.01]               | 0.2036     | 0.3308   | 0.8860   |
| 25                                     | 0.5          | [6,6]              | [0.25, 0.01]               | 0.2019     | 0.3295   | 0.8871   |
| varying the learning rate              |              |                    |                            |            |          |          |
| 25                                     | 0.5          | [5,5]              | [0.25, 0.01]               | 0.2132     | 0.3234   | 0.8867   |
| 25                                     | 0.5          | [5,5]              | [1e-1, 1e-2]               | 0.2061     | 0.3271   | 0.8870   |
| 25                                     | 0.5          | [5,5]              | [1e-1, 1e-1]               | 1.0833     | 1.0731   | 0.6625   |
| 25                                     | 0.5          | [5,5]              | [1e-2, 1e-2]               | 0.1983     | 0.3249   | 0.8875   |
| 25                                     | 0.5          | [5,5]              | [1e-2, 1e-3]               | 0.2517     | 0.3705   | 0.8748   |
| 25                                     | 0.5          | [5,5]              | [1e-1, 1e-3]               | 0.2616     | 0.3716   | 0.8727   |

<sup>a</sup>For the first step, the weights of the LSTM layers are kept frozen and the rest of the model is trained. In the second step, all layers are unfrozen so that the LSTM layers can be fine-tuned. <sup>b</sup>The notations such as [5,5] correspond to the number of epochs in each step and [0.25, 0.01] are the respective learning rates. One hyperparameter is varied at a time keeping others constant. The red color values and the highlighted rows respectively represent the best hyperparameter and optimal combination of the hyperparameters.

These optimal set of hyperparameters are considered for assessing the model performance on 30 independent runs on randomly selected train-test splits. The model performance provided in Table S30 is reported in terms of the commonly recommended metrics such as accuracy and perplexity. An average accuracy of ~88% over 10 runs could be obtained.

**Table S30.** The Calculated Train and Test Accuracies for the Target-task LM Using the Optimal Set of Hyperparameters

| sr. no. for runs     | train_loss | test_loss | accuracy      | perplexity    |
|----------------------|------------|-----------|---------------|---------------|
| 1                    | 0.2099     | 0.3316    | 0.8874        | 1.3931        |
| 2                    | 0.2131     | 0.3192    | 0.8912        | 1.3761        |
| 3                    | 0.2073     | 0.3397    | 0.8858        | 1.4045        |
| 4                    | 0.2162     | 0.3407    | 0.8854        | 1.4060        |
| 5                    | 0.2170     | 0.3514    | 0.8815        | 1.4211        |
| 6                    | 0.2173     | 0.3323    | 0.8887        | 1.3942        |
| 7                    | 0.2132     | 0.3402    | 0.8862        | 1.4053        |
| 8                    | 0.2174     | 0.3272    | 0.8896        | 1.3871        |
| 9                    | 0.2186     | 0.3475    | 0.8849        | 1.4155        |
| 10                   | 0.2131     | 0.3323    | 0.8878        | 1.3942        |
| average over 10 runs |            |           | 0.8869±0.0027 | 1.3997±0.0134 |

### 7.3 Target-task regressor fine-tuning

The hyperparameter optimization is performed for fine-tuning the target-task regressor. For this purpose, the full data is split into 70:10:20 train-validation-test sets. All the hyperparameters are tuned on the validation set. After hyperparameter tuning, the train and validation sets are merged for prediction on the test set. The models are evaluated using root mean squared error (RMSE) as the error metric (Table S31). In addition, the effect of SMILES augmentation and the gaussian noise is also considered for optimization.

**Table S31.** Hyperparameter Optimization for the Target-task Regressor Fine-tuning

| No. of augmented SMILES                | $\sigma_{g\_noise}$ | dropout_rate | epoch <sup>a</sup> | learning_rate <sup>b</sup> | train_rmse | val_rmse |
|----------------------------------------|---------------------|--------------|--------------------|----------------------------|------------|----------|
| varying the number of augmented SMILES |                     |              |                    |                            |            |          |
| 0                                      | n.a                 | 0.2          | [4,4,4,6]          | [0.1,0.01,0.001,0.001]     | 53.2583    | 55.3002  |
| 25                                     | 0.0                 | 0.2          | [4,4,4,6]          | [0.1,0.01,0.001,0.001]     | 7.6757     | 10.1177  |
| 50                                     | 0.0                 | 0.2          | [4,4,4,6]          | [0.1,0.01,0.001,0.001]     | 7.0685     | 10.5804  |
| 75                                     | 0.0                 | 0.2          | [4,4,4,6]          | [0.1,0.01,0.001,0.001]     | 6.7385     | 11.3816  |
| 100                                    | 0.0                 | 0.2          | [4,4,4,6]          | [0.1,0.01,0.001,0.001]     | 6.4796     | 9.8598   |
| varying the $\sigma_{g\_noise}$        |                     |              |                    |                            |            |          |

|                              |     |     |           |                               |         |         |
|------------------------------|-----|-----|-----------|-------------------------------|---------|---------|
| 100                          | 0.0 | 0.2 | [4,4,4,6] | [0.1,0.01,0.001,0.001]        | 6.4796  | 9.8598  |
| 100                          | 0.1 | 0.2 | [4,4,4,6] | [0.1,0.01,0.001,0.001]        | 6.5274  | 9.9870  |
| 100                          | 0.3 | 0.2 | [4,4,4,6] | [0.1,0.01,0.001,0.001]        | 6.4147  | 10.0175 |
| 100                          | 0.5 | 0.2 | [4,4,4,6] | [0.1,0.01,0.001,0.001]        | 6.4875  | 8.6581  |
| 100                          | 0.7 | 0.2 | [4,4,4,6] | [0.1,0.01,0.001,0.001]        | 6.5236  | 10.5676 |
| 100                          | 0.9 | 0.2 | [4,4,4,6] | [0.1,0.01,0.001,0.001]        | 6.4714  | 10.0816 |
| varying the dropout rate     |     |     |           |                               |         |         |
| 100                          | 0.5 | 0.0 | 100       | [0.1,0.01,0.001,0.001]        | 6.0390  | 8.9051  |
| 100                          | 0.5 | 0.1 | 100       | [0.1,0.01,0.001,0.001]        | 6.2551  | 8.7208  |
| 100                          | 0.5 | 0.2 | 100       | [0.1,0.01,0.001,0.001]        | 6.4875  | 8.6581  |
| 100                          | 0.5 | 0.3 | 100       | [0.1,0.01,0.001,0.001]        | 6.9044  | 9.5505  |
| 100                          | 0.5 | 0.4 | 100       | [0.1,0.01,0.001,0.001]        | 6.9461  | 12.3521 |
| 100                          | 0.5 | 0.5 | 100       | [0.1,0.01,0.001,0.001]        | 7.5880  | 11.9915 |
| 100                          | 0.5 | 0.6 | 100       | [0.1,0.01,0.001,0.001]        | 8.1788  | 11.2552 |
| 100                          | 0.5 | 0.7 | 100       | [0.1,0.01,0.001,0.001]        | 8.6819  | 12.1479 |
| 100                          | 0.5 | 0.8 | 100       | [0.1,0.01,0.001,0.001]        | 16.5154 | 18.3346 |
| 100                          | 0.5 | 0.9 | 100       | [0.1,0.01,0.001,0.001]        | 17.0877 | 18.8773 |
| varying the number of epochs |     |     |           |                               |         |         |
| 100                          | 0.5 | 0.2 | [2,2,2,4] | [0.1,0.01,0.001,0.001]        | 7.0960  | 12.2489 |
| 100                          | 0.5 | 0.2 | [2,2,3,4] | [0.1,0.01,0.001,0.001]        | 6.8996  | 10.7351 |
| 100                          | 0.5 | 0.2 | [2,3,3,4] | [0.1,0.01,0.001,0.001]        | 6.7606  | 10.9632 |
| 100                          | 0.5 | 0.2 | [3,3,3,4] | [0.1,0.01,0.001,0.001]        | 6.7643  | 10.9033 |
| 100                          | 0.5 | 0.2 | [3,3,4,4] | [0.1,0.01,0.001,0.001]        | 6.5815  | 10.5651 |
| 100                          | 0.5 | 0.2 | [3,4,4,4] | [0.1,0.01,0.001,0.001]        | 6.2720  | 9.6522  |
| 100                          | 0.5 | 0.2 | [4,5,5,5] | [0.1,0.01,0.001,0.001]        | 6.3624  | 9.5148  |
| 100                          | 0.5 | 0.2 | [5,5,5,5] | [0.1,0.01,0.001,0.001]        | 6.2547  | 9.0362  |
| 100                          | 0.5 | 0.2 | [5,5,5,6] | [0.1,0.01,0.001,0.001]        | 6.7054  | 8.6591  |
| 100                          | 0.5 | 0.2 | [3,4,5,6] | [0.1,0.01,0.001,0.001]        | 6.7926  | 8.8861  |
| 100                          | 0.5 | 0.2 | [5,5,6,6] | [0.1,0.01,0.001,0.001]        | 6.6360  | 8.2787  |
| 100                          | 0.5 | 0.2 | [5,5,5,7] | [0.1,0.01,0.001,0.001]        | 6.4233  | 10.3165 |
| 100                          | 0.5 | 0.2 | [5,6,6,6] | [0.1,0.01,0.001,0.001]        | 6.5439  | 7.9161  |
| 100                          | 0.5 | 0.2 | [6,6,6,6] | [0.1,0.01,0.001,0.001]        | 6.5653  | 8.8616  |
| 100                          | 0.5 | 0.2 | [5,6,6,6] | [0.1,0.01,0.001,0.0001]       | 6.7751  | 9.3255  |
| 100                          | 0.5 | 0.2 | [5,6,6,6] | [0.1,0.1,0.1,0.1]             | 17.9550 | 18.4490 |
| 100                          | 0.5 | 0.2 | [5,6,6,6] | [0.01,0.01,0.01,0.01]         | 12.0067 | 16.1513 |
| 100                          | 0.5 | 0.2 | [5,6,6,6] | [0.001,0.001,0.001,0.001]     | 7.1635  | 7.8248  |
| 100                          | 0.5 | 0.2 | [5,6,6,6] | [0.0001,0.0001,0.0001,0.0001] | 82.7212 | 82.3532 |
| 100                          | 0.5 | 0.2 | [5,6,6,6] | [0.01,0.01,0.01,0.001]        | 6.3735  | 8.3869  |
| 100                          | 0.5 | 0.2 | [5,6,6,6] | [0.01,0.01,0.01,0.0001]       | 6.4117  | 8.1440  |
| 100                          | 0.5 | 0.2 | [5,6,6,6] | [0.001,0.001,0.001,0.0001]    | 7.3962  | 8.7910  |
| 100                          | 0.5 | 0.2 | [5,6,6,6] | [0.01,0.01,0.001,0.001]       | 6.6774  | 8.2106  |
| 100                          | 0.5 | 0.2 | [5,6,6,6] | [0.01,0.001,0.001,0.0001]     | 7.2627  | 8.2271  |
| 100                          | 0.5 | 0.2 | [5,6,6,6] | [0.01,0.01,0.001,0.0001]      | 6.6716  | 8.2195  |
| 100                          | 0.5 | 0.2 | [5,6,6,6] | [0.01,0.01,0.001,0.00001]     | 6.6843  | 8.4328  |
| 100                          | 0.5 | 0.2 | [5,6,6,6] | [0.145,0.001,0.001,0.001]     | 7.1950  | 7.6958  |

|     |     |     |           |                           |        |        |
|-----|-----|-----|-----------|---------------------------|--------|--------|
| 100 | 0.5 | 0.2 | [5,6,6,6] | [0.145,0.01,0.001,0.001]  | 6.8491 | 7.6244 |
| 100 | 0.5 | 0.2 | [5,6,6,6] | [0.145,0.01,0.001,0.0001] | 6.7936 | 8.2566 |
| 100 | 0.5 | 0.2 | [5,6,6,6] | [0.145,0.01,0.01,0.001]   | 6.3279 | 8.8561 |
| 100 | 0.5 | 0.2 | [5,6,6,6] | [0.1,0.01,0.001,0.001]    | 6.7397 | 9.0314 |

<sup>a</sup>The regressor is fine-tuned using gradual unfreezing method in four steps: (i) the regressor, (ii) the regressor and the final LSTM layer, (iii) the regressor and the last two LSTM layers, and (iv) the full model. <sup>b</sup>A notations such as [5,6,6,6] and [0.1,0.01,0.001,0.001] respectively corresponds to the number of epochs used in each of these steps and the respective learning rates. The values shown in red color and the highlighted rows respectively represent the best hyperparameter and optimal combination of the hyperparameters.

The same set of hyperparameters is used for fine-tuning the target-task regressor on both the general-domain and target-task LM. We have considered 80:20 train-test splits. The final performance is reported in terms of RMSE, which is obtained as the average over 30 independent runs on randomized splits of the data. The results for individual runs are shown in Tables S32. It is to be noted that the train-test splits for all models, **TL-m1/m2** (with and without gradual unfreezing) and **TL-m0** were maintained the same.

**Table S32.** Test and Train RMSEs in the Fine-tuning of the Target-task Regressor<sup>a</sup>

| sr. no.<br>for<br>runs | fine-tuning on general-domain LM |                          |                    | fine-tuning on target-task LM |                          |                    |
|------------------------|----------------------------------|--------------------------|--------------------|-------------------------------|--------------------------|--------------------|
|                        | train_RMSE                       | test_RMSE<br>(canonical) | test_RMSE<br>(TTA) | train_RMSE                    | test_RMSE<br>(canonical) | test_RMSE<br>(TTA) |
| 1                      | 6.4831                           | 7.1543                   | 6.9134             | 6.3951                        | 7.0065                   | 7.0336             |
| 2                      | 6.4823                           | 7.7627                   | 7.6061             | 6.3808                        | 7.5288                   | 7.6528             |
| 3                      | 6.4352                           | 7.9334                   | 7.6228             | 6.4424                        | 7.9988                   | 7.4986             |
| 4                      | 6.4070                           | 7.2153                   | 6.7302             | 6.2699                        | 6.9781                   | 6.2519             |
| 5                      | 6.5837                           | 8.8045                   | 8.654              | 6.4534                        | 8.7123                   | 8.2751             |
| 6                      | 6.5015                           | 9.0709                   | 8.3727             | 6.2509                        | 8.6978                   | 8.3931             |
| 7                      | 6.2415                           | 8.3253                   | 8.3893             | 6.0646                        | 8.8900                   | 8.3231             |
| 8                      | 6.4830                           | 9.6592                   | 9.2044             | 6.1776                        | 8.1002                   | 8.8305             |
| 9                      | 6.3996                           | 10.6512                  | 8.951              | 6.3755                        | 8.9474                   | 9.7692             |
| 10                     | 6.0019                           | 12.2429                  | 11.7417            | 5.9964                        | 10.5252                  | 10.2156            |
| 11                     | 6.7729                           | 10.8738                  | 11.3783            | 6.5344                        | 10.6799                  | 10.49              |
| 12                     | 6.4075                           | 6.7824                   | 6.3079             | 6.2999                        | 6.5016                   | 6.3817             |
| 13                     | 6.7712                           | 8.3610                   | 9.1794             | 6.7755                        | 9.5184                   | 9.9077             |
| 14                     | 6.6373                           | 11.8554                  | 11.7642            | 6.4330                        | 11.8389                  | 11.6335            |
| 15                     | 6.0626                           | 8.2104                   | 7.4399             | 6.1445                        | 10.2678                  | 7.5643             |
| 16                     | 6.6253                           | 8.5903                   | 8.4659             | 6.4368                        | 8.888                    | 9.0602             |
| 17                     | 5.8803                           | 9.1805                   | 9.0947             | 5.8722                        | 8.0000                   | 8.3257             |
| 18                     | 6.6342                           | 8.2637                   | 8.5163             | 6.5425                        | 8.2447                   | 8.1822             |

|      |           |           |           |           |           |           |
|------|-----------|-----------|-----------|-----------|-----------|-----------|
| 19   | 6.1751    | 9.1275    | 8.7403    | 6.1261    | 10.1153   | 9.2296    |
| 20   | 6.0375    | 7.7473    | 7.3700    | 6.1215    | 6.4382    | 5.922     |
| 21   | 6.2681    | 8.8771    | 9.5586    | 6.1895    | 8.5950    | 9.3903    |
| 22   | 6.9788    | 7.0352    | 7.1374    | 7.9520    | 8.0962    | 8.3329    |
| 23   | 6.5947    | 6.8375    | 7.1538    | 7.8181    | 7.8853    | 7.446     |
| 24   | 6.2237    | 9.7672    | 8.7818    | 7.1913    | 9.5189    | 7.6745    |
| 25   | 6.4295    | 9.3975    | 9.4610    | 7.3495    | 10.824    | 9.9727    |
| 26   | 6.3058    | 7.9112    | 8.0869    | 7.5445    | 8.7828    | 8.7828    |
| 27   | 6.4070    | 8.2829    | 6.4856    | 7.6023    | 7.8470    | 7.6094    |
| 28   | 6.4146    | 7.0626    | 6.4744    | 7.2400    | 7.5183    | 6.8904    |
| 29   | 6.3801    | 7.3265    | 8.2900    | 7.3724    | 7.3979    | 7.0316    |
| 30   | 6.4853    | 6.4660    | 6.8232    | 7.2683    | 8.1942    | 7.6386    |
| avg. | 6.42±0.24 | 8.56±1.46 | 8.36±1.46 | 6.65±0.60 | 8.61±1.34 | 8.32±1.35 |

<sup>a</sup>The detail on the canonical and TTA SMILES is provided in Section 3.2.

## 7.4 Training the target-task regressor from scratch

To assess the impact of transfer learning, the target-task regressor is trained from scratch. The hyperparameters are tuned separately, details of which are given in Table S33.

**Table S33.** Hyperparameter Optimization for Training the Target-task Regressor from Scratch<sup>a</sup>

| No. of augmented SMILES                | $\sigma_{g\_noise}$ | dropout_rate | epoch | learning rate | val_rmse |
|----------------------------------------|---------------------|--------------|-------|---------------|----------|
| varying the number of augmented SMILES |                     |              |       |               |          |
| 0                                      | na                  | 0.2          | 10    | 0.001         | 86.2492  |
| 25                                     | 0.1                 | 0.2          | 10    | 0.001         | 79.3839  |
| 50                                     | 0.1                 | 0.2          | 10    | 0.001         | 65.3602  |
| 75                                     | 0.1                 | 0.2          | 10    | 0.001         | 43.4010  |
| 100                                    | 0.1                 | 0.2          | 10    | 0.001         | 28.5789  |
| varying the $\sigma_{g\_noise}$        |                     |              |       |               |          |
| 100                                    | 0.0                 | 0.2          | 10    | 0.001         | 24.6558  |
| 100                                    | 0.1                 | 0.2          | 10    | 0.001         | 28.5789  |
| 100                                    | 0.2                 | 0.2          | 10    | 0.001         | 25.9034  |
| 100                                    | 0.3                 | 0.2          | 10    | 0.001         | 28.7420  |
| 100                                    | 0.4                 | 0.2          | 10    | 0.001         | 29.5739  |
| 100                                    | 0.5                 | 0.2          | 10    | 0.001         | 27.1727  |
| 100                                    | 0.6                 | 0.2          | 10    | 0.001         | 29.9812  |
| 100                                    | 0.7                 | 0.2          | 10    | 0.001         | 29.5385  |
| 100                                    | 0.8                 | 0.2          | 10    | 0.001         | 28.2456  |
| 100                                    | 0.9                 | 0.2          | 10    | 0.001         | 30.1166  |
| varying the dropout rate               |                     |              |       |               |          |
| 100                                    | 0.0                 | 0.0          | 10    | 0.001         | 23.3387  |

|                              |     |     |    |        |         |
|------------------------------|-----|-----|----|--------|---------|
| 100                          | 0.0 | 0.1 | 10 | 0.001  | 21.9790 |
| 100                          | 0.0 | 0.2 | 10 | 0.001  | 24.6558 |
| 100                          | 0.0 | 0.3 | 10 | 0.001  | 25.6355 |
| 100                          | 0.0 | 0.4 | 10 | 0.001  | 21.5097 |
| 100                          | 0.0 | 0.5 | 10 | 0.001  | 28.0119 |
| 100                          | 0.0 | 0.6 | 10 | 0.001  | 26.2109 |
| 100                          | 0.0 | 0.7 | 10 | 0.001  | 28.2496 |
| 100                          | 0.0 | 0.8 | 10 | 0.001  | 21.8387 |
| 100                          | 0.0 | 0.9 | 10 | 0.001  | 23.4488 |
| varying the learning rate    |     |     |    |        |         |
| 100                          | 0.0 | 0.4 | 10 | 0.001  | 21.5097 |
| 100                          | 0.0 | 0.4 | 15 | 0.001  | 22.4838 |
| 100                          | 0.0 | 0.4 | 20 | 0.001  | 15.8147 |
| 100                          | 0.0 | 0.4 | 25 | 0.001  | 11.0299 |
| 100                          | 0.0 | 0.4 | 30 | 0.001  | 12.8097 |
| varying the number of epochs |     |     |    |        |         |
| 100                          | 0.0 | 0.4 | 25 | 0.1737 | 18.4131 |
| 100                          | 0.0 | 0.4 | 25 | 0.1    | 18.4209 |
| 100                          | 0.0 | 0.4 | 25 | 0.01   | 17.1556 |
| 100                          | 0.0 | 0.4 | 25 | 0.001  | 11.0299 |
| 100                          | 0.0 | 0.4 | 25 | 0.0001 | 79.8296 |

<sup>a</sup>The values shown in red color and the highlighted rows respectively represent the best hyperparameter and optimal combination of the hyperparameters.

The calculations are performed on randomized 80:20 train-test splits. The final performance is reported in terms of RMSE and MAE as average over 30 random runs. The results are shown in Table S34.

**Table S34.** Test and Train RMSEs for the Training of Target-task Regressor<sup>a</sup>

| sr. no. for runs | train_RMSE | test_RMSE (canonical) | test_RMSE (TTA) |
|------------------|------------|-----------------------|-----------------|
| 1                | 7.0093     | 8.2416                | 7.4975          |
| 2                | 7.0247     | 8.4522                | 7.8052          |
| 3                | 6.9414     | 7.6541                | 7.5151          |
| 4                | 9.9757     | 11.9544               | 11.6347         |
| 5                | 6.8868     | 9.1058                | 9.1324          |
| 6                | 7.6996     | 12.3174               | 11.5632         |
| 7                | 6.6959     | 8.4980                | 8.2466          |
| 8                | 6.7101     | 11.2563               | 8.9672          |
| 9                | 6.9545     | 8.7429                | 9.6581          |
| 10               | 7.2055     | 12.7918               | 11.6887         |
| 11               | 7.0258     | 10.8638               | 11.1881         |

|      |           |            |            |
|------|-----------|------------|------------|
| 12   | 6.9004    | 8.5317     | 7.1883     |
| 13   | 7.1502    | 10.4378    | 9.7087     |
| 14   | 7.7765    | 13.1691    | 12.1839    |
| 15   | 6.7726    | 8.3223     | 7.3839     |
| 16   | 9.5526    | 14.8627    | 13.3703    |
| 17   | 7.5351    | 9.6446     | 9.6636     |
| 18   | 11.4004   | 12.3832    | 14.6339    |
| 19   | 7.1086    | 10.3574    | 9.9278     |
| 20   | 8.2092    | 11.6709    | 9.5863     |
| 21   | 6.8711    | 10.3343    | 10.4505    |
| 22   | 14.0025   | 15.8687    | 17.0431    |
| 23   | 6.9827    | 8.4816     | 7.7984     |
| 24   | 6.8561    | 11.1695    | 9.8039     |
| 25   | 7.7818    | 11.7818    | 11.7146    |
| 26   | 10.4114   | 11.4630    | 11.4880    |
| 27   | 6.9929    | 7.3369     | 7.2143     |
| 28   | 6.5493    | 7.5074     | 7.3504     |
| 29   | 8.5874    | 17.7851    | 12.3234    |
| 30   | 6.9736    | 9.0151     | 8.3124     |
| avg. | 7.82±1.68 | 10.67±2.54 | 10.07±2.40 |

<sup>a</sup>The detail on the canonical and TTA SMILES is provided in Section 3.2.

## 7.5 Y-randomization

With the randomized target values, the regressor is fine-tuned on the general-domain LM. The results for are shown in Table S35. The test and train RMSEs are found to be much inferior as compared to when original output values were used.

**Table S35.** Test and Train RMSEs for the Training of the Target-task Regressor on 80:20 Train-test Splits in y-Randomization Runs<sup>a</sup>

| sr. no.<br>for<br>runs | train_RMSE | test_RMSE<br>(canonical) | test_RMSE<br>(TTA) |
|------------------------|------------|--------------------------|--------------------|
| 1                      | 7.8551     | 16.9848                  | 17.8943            |
| 2                      | 7.9340     | 24.1535                  | 24.2757            |
| 3                      | 7.7546     | 19.6323                  | 20.9865            |
| 4                      | 7.9085     | 18.4658                  | 18.7339            |
| 5                      | 7.2827     | 19.4899                  | 19.7476            |
| 6                      | 7.5065     | 19.6614                  | 23.3269            |
| 7                      | 7.7162     | 17.9601                  | 18.8415            |
| 8                      | 7.5627     | 18.9467                  | 20.8702            |



|      |           |             |            |
|------|-----------|-------------|------------|
| 9    | 7.8764    | 22.8475     | 21.5071    |
| 10   | 8.2802    | 17.8417     | 18.7951    |
| avg. | 7.77±0.27 | 19.601±2.25 | 20.50±2.10 |

<sup>a</sup>The detail on the canonical and TTA SMILES is provided in Section 3.2.

## 7.6 Target-task regressor fine-tuning without gradual unfreezing and with a constant learning rate

The hyperparameter optimization is performed for fine-tuning the target-task regressor. For this purpose, the full data is split into 70:10:20 train-validation-test sets. All the hyperparameters are tuned on the validation set. After hyperparameter tuning, the train and validation sets are merged for prediction on the test set. The models are evaluated using root mean squared error (RMSE) as the error metric (Table S36).

**Table S36.** Hyperparameter Optimization for Fine-tuning the Target-task Regressor Without Gradual Unfreezing<sup>a</sup>

| No. of augmented SMILES                | $\sigma_{g\_noise}$ | dropout_rate | epoch | learning rate | train_rmse | val_rmse |
|----------------------------------------|---------------------|--------------|-------|---------------|------------|----------|
| varying the number of augmented SMILES |                     |              |       |               |            |          |
| 0                                      | na                  | 0.0          | 10    | 0.001         | 86.9343    | 90.0828  |
| 25                                     | 0.0                 | 0.0          | 10    | 0.001         | 78.5605    | 78.4938  |
| 50                                     | 0.0                 | 0.0          | 10    | 0.001         | 63.2845    | 63.1162  |
| 75                                     | 0.0                 | 0.0          | 10    | 0.001         | 42.6581    | 46.6106  |
| 100                                    | 0.0                 | 0.0          | 10    | 0.001         | 20.7015    | 25.0300  |
| 125                                    | 0.0                 | 0.0          | 10    | 0.001         | 7.5218     | 8.1621   |
| 150                                    | 0.0                 | 0.0          | 10    | 0.001         | 6.9791     | 7.4883   |
| 175                                    | 0.0                 | 0.0          | 10    | 0.001         | 7.3050     | 7.1090   |
| 200                                    | 0.0                 | 0.0          | 10    | 0.001         | 6.7834     | 7.76074  |
| varying the $\sigma_{g\_noise}$        |                     |              |       |               |            |          |
| 150                                    | 0.0                 | 0.0          | 10    | 0.001         | 6.9791     | 7.4883   |
| 150                                    | 0.2                 | 0.0          | 10    | 0.001         | 6.9550     | 7.3471   |
| 150                                    | 0.4                 | 0.0          | 10    | 0.001         | 6.9596     | 7.2019   |
| 150                                    | 0.6                 | 0.0          | 10    | 0.001         | 7.0340     | 7.3252   |
| varying the dropout rate               |                     |              |       |               |            |          |
| 150                                    | 0.0                 | 0.0          | 10    | 0.001         | 6.9791     | 7.4883   |
| 150                                    | 0.0                 | 0.1          | 10    | 0.001         | 7.6973     | 6.9331   |
| 150                                    | 0.0                 | 0.2          | 10    | 0.001         | 8.1398     | 7.75581  |
| varying the number of epochs           |                     |              |       |               |            |          |
| 150                                    | 0.0                 | 0.0          | 10    | 0.001         | 6.9791     | 7.4883   |

|     |     |     |    |       |        |         |
|-----|-----|-----|----|-------|--------|---------|
| 150 | 0.0 | 0.0 | 15 | 0.001 | 6.6557 | 6.70127 |
| 150 | 0.0 | 0.0 | 20 | 0.001 | 6.3491 | 7.31165 |

<sup>a</sup>The values shown in red color and the highlighted rows respectively represent the best hyperparameter and optimal combination of the hyperparameters.

The final performance is reported in terms of RMSE is obtained as the average over 30 independent runs on randomized splits of the data. The results are shown in Table S37.

**Table S37.** Test and Train RMSEs for the Training of Target-task Regressor on 80:20 Train-test Splits<sup>a</sup>

| sr.<br>no.<br>for<br>runs | fine-tuning on general-domain LM |                          |                    | fine-tuning on target-task LM |                          |                    |
|---------------------------|----------------------------------|--------------------------|--------------------|-------------------------------|--------------------------|--------------------|
|                           | train_RMSE                       | test_RMSE<br>(canonical) | test_RMSE<br>(TTA) | train_RMSE                    | test_RMSE<br>(canonical) | test_RMSE<br>(TTA) |
| 1                         | 6.1656                           | 8.3282                   | 7.4518             | 6.2941                        | 7.5533                   | 7.3147             |
| 2                         | 5.9816                           | 8.3008                   | 7.6472             | 6.1454                        | 7.6607                   | 7.7940             |
| 3                         | 6.3851                           | 7.5690                   | 7.3072             | 6.5154                        | 7.9773                   | 7.6173             |
| 4                         | 6.2470                           | 7.0483                   | 6.4474             | 6.4059                        | 7.3502                   | 7.1574             |
| 5                         | 6.0943                           | 8.7158                   | 8.6497             | 6.1612                        | 8.9997                   | 9.1463             |
| 6                         | 6.0296                           | 9.6768                   | 9.0668             | 6.2411                        | 10.3591                  | 9.8667             |
| 7                         | 5.9266                           | 7.9520                   | 8.2429             | 6.1065                        | 9.8461                   | 8.4521             |
| 8                         | 5.8263                           | 8.7675                   | 8.3285             | 6.0228                        | 8.6979                   | 8.1588             |
| 9                         | 6.0108                           | 10.0582                  | 10.7021            | 6.1464                        | 10.3157                  | 10.6121            |
| 10                        | 5.6641                           | 10.4968                  | 9.7863             | 5.8417                        | 9.9422                   | 9.5187             |
| 11                        | 6.2025                           | 9.8821                   | 9.9324             | 6.1775                        | 9.2187                   | 9.5673             |
| 12                        | 5.9060                           | 5.9633                   | 5.5552             | 5.8713                        | 5.8987                   | 5.6992             |
| 13                        | 6.1176                           | 9.0206                   | 9.1201             | 6.1145                        | 9.0234                   | 8.8914             |
| 14                        | 5.9750                           | 11.3824                  | 11.481             | 5.9515                        | 11.3757                  | 11.4354            |
| 15                        | 6.0170                           | 7.2819                   | 7.2342             | 6.0493                        | 7.4005                   | 7.2790             |
| 16                        | 6.0186                           | 9.132                    | 9.1146             | 6.0066                        | 9.2331                   | 9.0435             |
| 17                        | 5.6086                           | 8.8846                   | 8.2608             | 5.6314                        | 7.9259                   | 8.2685             |
| 18                        | 6.0329                           | 7.931                    | 7.7475             | 6.0321                        | 7.6410                   | 7.8745             |
| 19                        | 5.9597                           | 9.8558                   | 9.2248             | 5.9334                        | 9.7983                   | 9.0473             |
| 20                        | 5.8749                           | 6.2503                   | 5.7559             | 5.8535                        | 5.8362                   | 5.6406             |
| 21                        | 6.1665                           | 8.7817                   | 9.2328             | 6.1462                        | 8.3732                   | 8.884              |
| 22                        | 6.4105                           | 7.5811                   | 6.9311             | 6.3992                        | 7.6234                   | 7.217              |
| 23                        | 5.9079                           | 7.3392                   | 7.1642             | 6.0982                        | 8.7617                   | 8.0154             |
| 24                        | 5.7256                           | 10.0889                  | 9.2731             | 5.8651                        | 9.3102                   | 7.8248             |
| 25                        | 6.0126                           | 10.1242                  | 10.3381            | 6.1289                        | 12.2371                  | 10.6295            |
| 26                        | 6.0494                           | 7.532                    | 7.9403             | 6.1748                        | 8.3397                   | 8.1284             |
| 27                        | 6.2488                           | 6.2098                   | 6.0733             | 6.3963                        | 7.0955                   | 6.6839             |
| 28                        | 5.9329                           | 6.9747                   | 6.8276             | 6.0717                        | 7.6027                   | 6.5536             |
| 29                        | 5.8946                           | 7.2685                   | 6.6414             | 5.9899                        | 7.4048                   | 6.9557             |

|      |           |           |           |           |           |           |
|------|-----------|-----------|-----------|-----------|-----------|-----------|
| 30   | 6.0498    | 6.9438    | 7.0423    | 6.1637    | 7.4293    | 7.1086    |
| avg. | 6.01±0.18 | 8.38±1.40 | 8.15±1.49 | 6.10±0.19 | 8.54±1.46 | 8.21±1.40 |

<sup>a</sup>The detail on the canonical and TTA SMILES is provided in Section 3.2.

## 7.7 Importance of composite reaction representation

The input representation is a concatenation of SMILES of ligands and substrates (as described in Section 3). To examine the contribution from ligand and substrate, an additional analysis is performed on Reaction-3 data set. First, the SMILES of ligands are randomly shuffled across rows (keeping substrate SMILES as it is) such that in the new reaction representation, the ligands don't correspond to true output. Similar analysis is done by random shuffling of substrate SMILES (keeping ligand SMILES the same). As can be seen from the data provided in Table S38, the test and train RMSEs obtained using the SMILES of either random ligand or substrate, are found to be much inferior to when the original composite reaction representation was used.

The **TL-m1** model without gradual unfreezing is used for these calculations.

**Table S38.** Test and Train RMSEs of Target-task Regressor with Randomized SMILES of Ligands and Substrates for Reaction-3<sup>a</sup>

| sr.<br>no.<br>for<br>runs | randomized ligand SMILES |                          |                    | randomized substrate SMILES |                          |                    |
|---------------------------|--------------------------|--------------------------|--------------------|-----------------------------|--------------------------|--------------------|
|                           | train_RMSE               | test_RMSE<br>(canonical) | test_RMSE<br>(TTA) | train_RMSE                  | test_RMSE<br>(canonical) | test_RMSE<br>(TTA) |
| 1                         | 6.2999                   | 9.5962                   | 10.2658            | 6.0626                      | 16.5713                  | 15.9825            |
| 2                         | 6.1268                   | 14.0456                  | 13.8714            | 6.1643                      | 22.5128                  | 22.1144            |
| 3                         | 5.9165                   | 11.3729                  | 10.4956            | 6.5410                      | 23.8279                  | 24.3386            |
| 4                         | 6.3746                   | 9.8040                   | 10.7601            | 6.3212                      | 20.3056                  | 21.0637            |
| 5                         | 5.9490                   | 11.1098                  | 11.2667            | 6.0441                      | 15.6052                  | 14.6409            |
| 6                         | 5.7531                   | 12.7582                  | 11.8772            | 5.8501                      | 20.4670                  | 21.1900            |
| 7                         | 6.1662                   | 11.6884                  | 11.5273            | 6.1297                      | 19.9021                  | 19.6064            |
| 8                         | 6.1942                   | 11.8862                  | 12.462             | 6.1523                      | 20.2041                  | 17.9354            |
| 9                         | 5.9133                   | 10.8669                  | 10.5608            | 6.1880                      | 23.1852                  | 22.4933            |
| 10                        | 5.6600                   | 13.3108                  | 13.4323            | 6.1920                      | 18.8965                  | 18.6219            |
| avg.                      | 6.04±0.23                | 11.64±1.43               | 11.65±1.26         | 6.16±0.18                   | 20.15±2.66               | 19.80±3.03         |

<sup>a</sup>The details of the canonical and TTA SMILES is provided in Section 3.2.

## 8. Data augmentation

The randomized SMILES (generated through different starting atom) are used as a technique for data augmentation. The SMILES augmentation of the training data (details are provided in Section 3.1) is found to be very useful especially for small datasets. The results reflecting the impact of SMILES augmentation on all four reactions is provided in Table S39.

In the case of reaction-3, without any data augmentation, it is observed that the output values for all the samples got predicted in the range 18-20. Since this data dataset is for the 80-100 range, a large RMSE is obtained. As we increased the number of augmented SMILES, a significant improvement in the model performance could be noted as can be gleaned from the data presented in Table S39.

**Table S39.** Impact of Varying Number of Augmented SMILES on Test Set Performance

| No. of augmented SMILES | Test RMSE  |            |            |
|-------------------------|------------|------------|------------|
|                         | Reaction-1 | Reaction-2 | Reaction-3 |
| 0                       | 9.0139     | 8.0897     | 67.6156    |
| 25                      | 6.0044     | 7.5611     | 8.7541     |
| 50                      | 6.2373     | 7.4954     | 8.0240     |
| 75                      | 4.9759     | 7.4071     | 8.7551     |
| 100                     | -          | 9.5849     | 6.8348     |

## 9. Time economy

The extraction of chemically relevant molecular features using quantum chemical computations could be resource intensive and time consuming. For example, one of the commonly employed descriptors is vibrational frequencies and the corresponding intensities of the chosen normal mode of vibration. Although one could use relative atomic displacements for automatic identification of normal modes of interest, it is not always easy to ascertain whether a given mode is vibration or rotation, thus inducing a chance of error in judgment. Manually curating such data over thousands of samples can become tedious. There are other molecular features, which might not be amenable to an automated workflow, but would demand individual

attention/extraction/decision. The use of SMILES as the molecular representation bypasses all these steps (as illustrated in Fig. S10) and thus provides a highly time economic tool, particularly for a larger samples space.

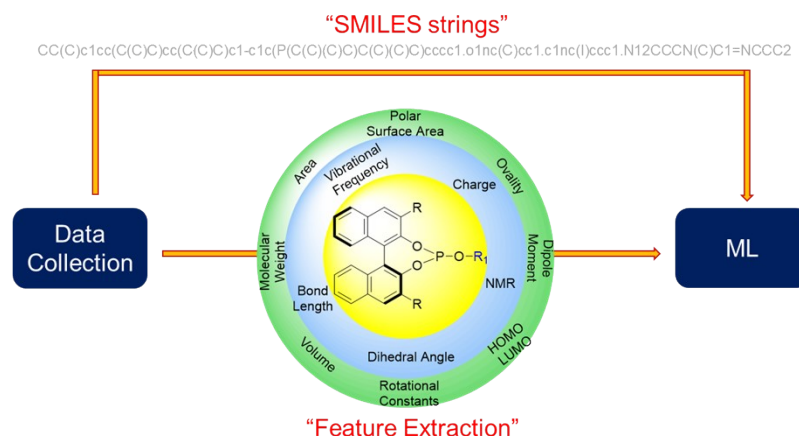

**Fig. S10.** A general comparison of the conventional workflow involving feature extraction and the one bypassing it by using the SMILES representation for molecules.

A representative case (reaction-3) is considered here for additional discussion. The minimum CPU time consumed for the optimization and frequency calculation of a typical ligand was more than 32 cpu hours, while it is close to 1 cpu hour for the optimization of a small substrate molecule (as collected from the respective output files of the quantum chemical program). There are 58 ligands and 190 substrates (as shown in Table S26), which need to be optimized for collecting the primary features. This would demand approximately ~2000 cpu hours. In addition to this, additional computations for the evaluation of NMR descriptors would demand additional cpu hours across all the above reaction partners. The molecular features like vibrational frequencies, sterimol etc., need extra human attention. On the other hand, the use of SMILES to build the data suitable for ML can bypasses the need for any tiresome feature extraction. Thus, countable (measured in terms of cpu hours), partially countable (codes that would help extract features), and uncountable (human time spent for cogent assessments of the large feature space)

aspects that contribute to the overall time spent before one can get the first set of results are far lower in the representation learning method we have employed in this study. Thus, our approach is time-economic.

## 10. Analysis of the encoder output

In order to get an insight into what the model is actually learning; we extracted the output that the encoder passes to the decoder. The output size is same as the embedding size, i.e., 400 (see Fig. S3). For each reaction, 100 different samples are randomly selected for this analysis. The 100x400 matrix obtained from the encoder output is then processed using the principal component analysis (PCA). Next, a k-means clustering is performed on the first two principal components as obtained through the PCA. Interesting clusters were noticed for all four reaction, details of which are presented below.

### 10.1 Reaction-1

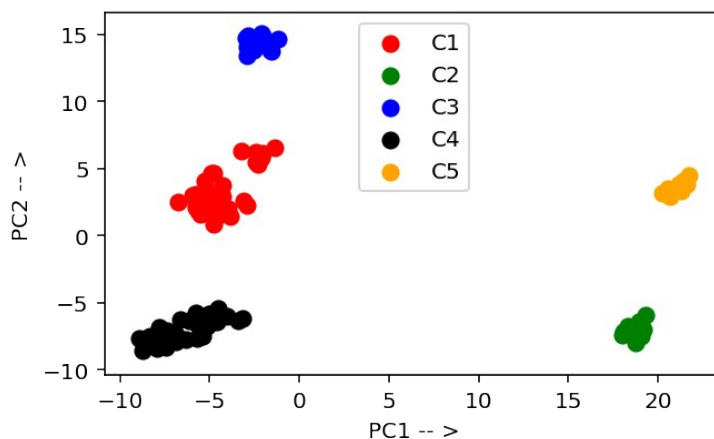

**Fig. S11.** K-means clustering on reaction-1.

For reaction-1, five distinct clusters were obtained on the basis of ligand and base (Fig. S11). In cluster 1 (denoted as C1, shown in red color), we noticed that **L2-L3** remains together with base **B3** while **L1** forms a group with **B1-B2**. The **L4** formed two separate clusters C2 (green) and C5 (orange), where C2 consists of **B1** and **B2** bases whereas C5 cluster has **B3** as the only base.

Cluster 3 (C3, blue) showed a combination between **L1** and **B3**. In C4 (black), we noticed a combination of **L2** and **L3** ligands. Further details of how various samples are distributed between the five clusters can be gathered from Table S40.

**Table S40.** Identities of Samples in Different Clusters for Reaction-1 (see Table S1 for the details of sample nomenclature)

| Clusters       |                |                |                |                |
|----------------|----------------|----------------|----------------|----------------|
| C1             | C2             | C3             | C4             | C5             |
| L3-B3-AH5-A2   | L4-B2-AH2-A12  | L1-B3-AH4-A8   | L3-B2-AH14-A2  | L4-B3-AH2-A4   |
| L3-B3-AH3-A4   | L4-B2-AH3-A14  | L1-B3-AH6-A8   | L3-B1-AH6-A1   | L4-B3-AH2-A6   |
| L3-B3-AH14-A1  | L4-B1-AH15-A9  | L1-B3-AH2-A10  | L3-B2-AH11-A3  | L4-B3-AH13-A1  |
| L3-B3-AH13-A7  | L4-B2-AH2-A11  | L1-B3-AH6-A12  | L3-B1-AH15-A5  | L4-B3-AH1-A3   |
| L3-B3-AH15-A12 | L4-B2-AH12-A15 | L1-B3-AH14-A14 | L3-B1-AH9-A8   | L4-B3-AH14-A8  |
| L3-B3-AH4-A14  | L4-B2-AH10-A17 | L1-B3-AH15-A9  | L3-B2-AH4-A10  | L4-B3-AH1-A10  |
| L3-B3-AH9-A15  | L4-B2-AH4-A21  | L1-B3-AH3-A11  | L3-B2-AH6-A15  | L4-B3-AH6-A12  |
| L2-B3-AH8-A4   | L4-B1-AH7-A18  | L1-B3-AH8-A11  | L3-B1-AH15-A23 | L4-B3-AH1-A11  |
| L2-B3-AH15-A10 | L4-B1-AH2-A22  | L1-B3-AH3-A16  | L3-B2-AH13-A23 | L4-B3-AH15-A16 |
| L2-B3-AH6-A14  |                | L1-B3-AH13-A2  | L3-B2-AH13-A17 |                |
| L2-B3-AH13-A18 |                |                | L3-B2-AH15-A17 |                |
| L1-B1-AH1-A4   |                |                | L3-B2-AH5-A21  |                |
| L1-B2-AH13-A1  |                |                | L3-B1-AH4-A18  |                |
| L1-B1-AH5-A5   |                |                | L3-B2-AH1-A20  |                |
| L1-B2-AH15-A7  |                |                | L3-B1-AH8-A2   |                |
| L1-B1-AH3-A8   |                |                | L2-B1-AH6-A4   |                |
| L1-B2-AH7-A8   |                |                | L2-B1-AH12-A3  |                |
| L1-B1-AH10-A12 |                |                | L2-B1-AH11-A7  |                |
| L1-B2-AH1-A12  |                |                | L2-B2-AH1-A7   |                |
| L1-B2-AH13-A14 |                |                | L2-B2-AH14-A8  |                |
| L1-B1-AH12-A9  |                |                | L2-B1-AH13-A10 |                |
| L1-B2-AH10-A11 |                |                | L2-B2-AH5-A10  |                |
| L1-B2-AH13-A11 |                |                | L2-B2-AH13-A10 |                |
| L1-B1-AH14-A13 |                |                | L2-B2-AH8-A12  |                |
| L1-B1-AH15-A13 |                |                | L2-B2-AH5-A14  |                |
| L1-B2-AH12-A13 |                |                | L2-B1-AH8-A23  |                |
| L1-B2-AH10-A17 |                |                | L2-B2-AH4-A23  |                |
| L1-B1-AH15-A19 |                |                | L2-B2-AH9-A17  |                |
| L1-B1-AH3-A18  |                |                | L2-B2-AH14-A16 |                |
| L1-B1-AH4-A18  |                |                | L2-B1-AH12-A18 |                |
| L1-B2-AH2-A18  |                |                | L2-B1-AH1-A20  |                |
| L1-B2-AH7-A18  |                |                | L2-B1-AH5-A20  |                |
| L1-B2-AH7-A20  |                |                | L2-B1-AH15-A20 |                |
| L1-B1-AH11-A22 |                |                | L2-B2-AH3-A20  |                |

## 10.2 Reaction-2

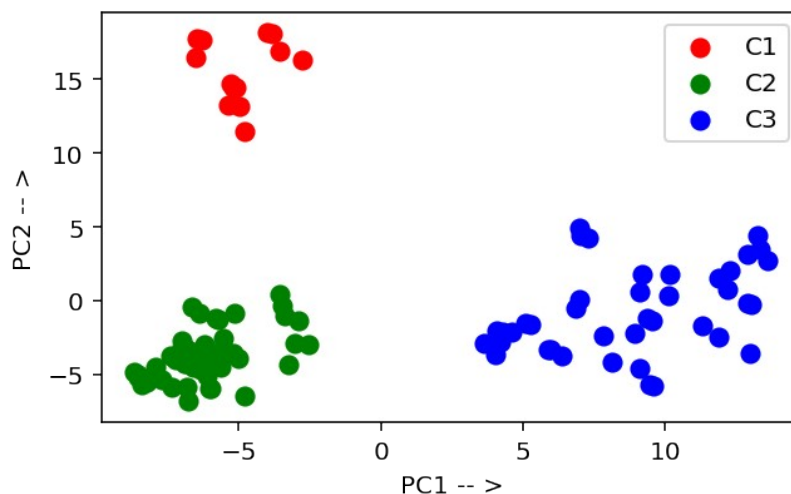

**Fig. S12.** K-means clustering on reaction-2.

Examination of Fig. S12, for reaction-2, reveals the formation of three distinct clusters on the basis of the ligand (Fig. S12). The reaction details are given in Table S15. In cluster 2 (shown as C2 in green color), shows the presence of ligands bearing relatively larger 3,3'-substituents with -CF<sub>3</sub>, -Si(Ph)<sub>3</sub> and C(Me)<sub>3</sub> groups. On the other hand, in the case of C3 cluster (blue), the ligands have relatively smaller 3,3'-substituents with -OMe, -Me, -Br, -Cl groups on the aryl rings of those substituents. In C1 (red), the size of the 3,3'-substituents are approximately in between that of the ligands present in clusters C2 and C3. More details various samples can be found in Table S41.

**Table S41.** Details of Samples in Different Clusters for Reaction-2 (see Table S17 for the details of sample nomenclature)

| C1         | C2         | C3         |
|------------|------------|------------|
| L39-I1-T2  | L25- I4-T3 | L22- I1-T3 |
| L39- I1-T3 | L16- I1-T1 | L22- I2-T2 |
| L39- I3-T5 | L16- I4-T1 | L22- I5-T1 |
| L26- I1-T1 | L16- I4-T3 | L28- I2-T1 |
| L26- I1-T2 | L16- I5-T2 | L8- I1-T4  |
| L26- I3-T1 | L6- I5-T5  | L8- I2-T4  |
| L26- I5-T3 | L10- I4-T1 | L8- I5-T3  |
| L42- I4-T4 | L10- I4-T3 | L13- I1-T5 |
| L42- I4-T4 | L43- I3-T4 | L13- I5-T1 |
| L42- I1-T5 | L43- I5-T1 | L13- I5-T4 |



|            |            |            |
|------------|------------|------------|
| L29- I3-T5 | L40- I2-T2 | L23- I3-T5 |
| L29- I4-T3 | L40- I5-T3 | L1- I2-T1  |
| L29- I1-T2 | L32- I1-T1 | L1- I2-T4  |
|            | L32- I1-T2 | L1- I3-T1  |
|            | L32- I3-T1 | L41- I2-T4 |
|            | L32- I3-T3 | L41- I2-T5 |
|            | L32- I3-T4 | L41- I4-T1 |
|            | L32- I3-T5 | L41- I4-T3 |
|            | L32- I5-T2 | L41- I5-T1 |
|            | L33- I2-T3 | L9- I2-T1  |
|            | L33- I2-T4 | L9- I3-T3  |
|            | L33- I4-T5 | L9- I4-T4  |
|            | L24- I4-T3 | L9- I5-T3  |
|            | L2- I1-T2  | L11- I1-T1 |
|            | L2- I3-T5  | L11- I1-T3 |
|            | L2- I4-T5  | L11- I4-T1 |
|            | L2- I5-T1  | L15- I3-T5 |
|            | L5- I1-T1  | L15- I4-T4 |
|            | L5- I2-T2  | L12- I4-T2 |
|            | L5- I4-T4  | L12- I4-T3 |
|            | L14- I4-T5 | L37- I1-T1 |
|            | L35- I2-T3 | L37- I1-T5 |
|            | L35- I3-T2 | L20- I1-T4 |
|            | L35- I4-T1 | L20- I1-T5 |
|            | L35- I4-T2 | L38- I2-T1 |
|            | L30- I1-T4 | L38- I1-T3 |
|            | L30- I4-T3 | L38- I4-T1 |
|            | L18- I2-T2 | L38- I5-T4 |
|            | L18- I3-T5 | L34- I1-T3 |
|            | L4- I2-T3  | L34- I4-T5 |
|            | L4- I3-T3  |            |
|            | L4- I3-T4  |            |
|            | L36- I5-T5 |            |
|            | L3- I1-T2  |            |
|            | L3- I4-T2  |            |
|            | L19- I1-T2 |            |
|            | L19- I5-T3 |            |

### 10.3 Reaction-3

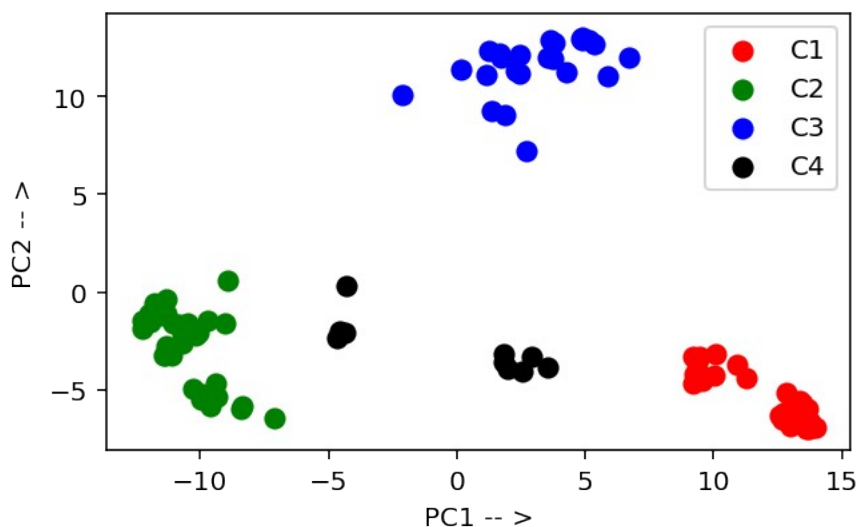

**Fig. S13.** K-means clustering on reaction-3.

Four distinct clusters were obtained in the case of reaction-3, which is formed on the basis of ligand (Fig. S13). The reaction details are provided in Table S26. In cluster C2 (shown in green color), BINOL-phosphite and BINOL-phosphoramidite ligands get grouped together whereas BINOL-phosphoramidite appears exclusively in cluster C4 (black) as well. The similar ligands, BINAP and BINAP-O form cluster C3 (blue). The unique group of BINOL-phosphoric acid organocatalyst forms a distinct cluster C1 (red). More details of sample distribution can be found in Table S42.

**Table S42.** Details of Samples in Different Clusters for Reaction-3 (see Table S28 for the details of sample nomenclature)

| C1       | C2     | C3      | C3      |
|----------|--------|---------|---------|
| L49-S116 | L6-S1  | L37-S2  | L25-S22 |
| L49-S116 | L1-S2  | L36-S63 | L22-S22 |
| L49-S118 | L2-S2  | L39-S2  | L23-S22 |
| L49-S122 | L1-S3  | L39-S3  | L23-S23 |
| L49-S124 | L8-S3  | L35-S75 | L27-S38 |
| L49-S126 | L13-S3 | L35-S87 | L27-S40 |
| L50-S129 | L14-S3 | L35-S89 | L27-S42 |
| L50-S129 | L15-S3 | L44-S91 | L27-S53 |
| L50-S134 | L9-S5  | L44-S93 | L27-S54 |

|          |         |          |         |
|----------|---------|----------|---------|
| L50-S138 | L20-S1  | L44-S97  | L27-S56 |
| L51-S4   | L21-S9  | L44-S100 |         |
| L51-S148 | L21-S17 | L44-S101 |         |
| L55-S149 | L21-S20 | L41-S2   |         |
| L55-S149 | L26-S24 | L45-S2   |         |
| L55-S149 | L26-S27 | L42-S3   |         |
| L55-S152 | L26-S28 | L43-S3   |         |
| L55-S7   | L26-S29 | L45-S3   |         |
| L55-S158 | L26-S30 | L43-S106 |         |
| L55-S159 | L26-S32 | L43-S108 |         |
| L55-S161 | L28-S61 | L46-S110 |         |
| L57-S155 | L28-S62 | L47-S59  |         |
| L57-S162 | L28-S1  | L47-S59  |         |
| L57-S149 | L29-S4  | L47-S111 |         |
| L57-S168 | L30-S3  | L47-S112 |         |
| L50-S172 | L30-S4  |          |         |
| L50-S180 | L30-S61 |          |         |
| L50-S182 | L21-S59 |          |         |
| L50-S187 | L21-S4  |          |         |
|          | L21-S61 |          |         |
|          | L31-S61 |          |         |
|          | L31-S1  |          |         |
|          | L32-S2  |          |         |
|          | L32-S59 |          |         |
|          | L32-S61 |          |         |
|          | L32-S62 |          |         |
|          | L32-S1  |          |         |
|          | L33-S59 |          |         |
|          | L33-S4  |          |         |

## 11. Comparison of performance of target-task regressor fine-tuning with and without gradual unfreezing

The average performance over 30 runs for all three reactions is provided in Table S43. Here, **TL-m** denotes the fine-tuning without gradual unfreezing and **TL-m'** denotes the fine-tuning with gradual unfreezing.

**Table S43.** Performance Comparison of TL Models With and Without Gradual Unfreezing

|            | RMSE  | TL-m1      | TL-m1'     | TL-m2      | TL-m2'     | TL-m0      |
|------------|-------|------------|------------|------------|------------|------------|
| Reaction-1 | train | 5.63±0.44  | 6.15±0.28  | 6.07±0.45  | 7.05±0.19  | 6.68±0.29  |
|            | test  | 4.89±0.33  | 6.02±0.29  | 5.27±0.34  | 6.69±0.27  | 5.84±0.49  |
| Reaction-2 | train | 12.05±0.30 | 11.51±0.96 | 12.07±0.27 | 11.54±0.95 | 12.71±0.32 |
|            | test  | 8.65±0.80  | 8.88±0.96  | 8.61±0.67  | 9.11±1.15  | 11.83±1.75 |
|            |       |            |            |            |            |            |

|            |       |           |           |           |           |            |
|------------|-------|-----------|-----------|-----------|-----------|------------|
| Reaction-3 | train | 6.01±0.18 | 6.42±0.24 | 6.10±0.19 | 6.65±0.60 | 7.82±1.68  |
|            | test  | 8.38±1.40 | 8.56±1.46 | 8.54±1.46 | 8.61±1.34 | 10.67±2.54 |

## 12. Hyperparameter optimization procedure

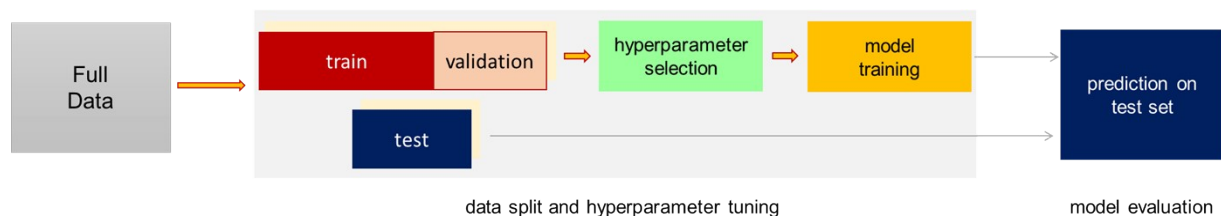

**Fig. S14.** The training and evaluation procedure employed in this study.

For the purpose of hyperparameter optimization, the full data is first split into 70:10:20 train-validation-test sets. The hyperparameters are tuned on the single train-validation set. After the hyperparameter tuning, the train and validation sets are merged to form a train set. The model is trained on this train set using the optimal values of the hyperparameters. The trained model is further used for prediction on the test set, which is not a part of the train or validation sets (Fig. S14).

In addition, we have performed hyperparameter tuning on 3 random train-validation splits for reaction-3 to examine whether the composition of the validation set has any notable impact. The result of hyperparameter optimization is provided in Table S44. The number of augmented SMILES is 150 with  $\sigma_{\text{g\_noise}}$  of 0.0 (Table S34).

**Table S44.** Hyperparameter Optimization for Fine-tuning the Target-task Regressor Without Gradual Unfreezing for Three Random Train-Validation Splits<sup>a</sup>

| dropout rate | epoch | learning rate | train rmse | val rmse |
|--------------|-------|---------------|------------|----------|
| split-1      |       |               |            |          |
| 0.0          | 10    | 0.001         | 6.7209     | 7.8927   |
| 0.1          | 10    | 0.001         | 7.0252     | 8.4470   |
| 0.2          | 10    | 0.001         | 7.2419     | 8.8648   |
| 0.0          | 10    | 0.0001        | 83.5559    | 85.3966  |
| 0.0          | 10    | 0.01          | 9.0139     | 10.1404  |

|         |    |        |         |         |
|---------|----|--------|---------|---------|
| 0.0     | 15 | 0.001  | 6.4421  | 8.1865  |
| 0.0     | 20 | 0.001  | 6.0409  | 8.9503  |
| split-2 |    |        |         |         |
| 0.0     | 10 | 0.001  | 6.8216  | 12.5656 |
| 0.1     | 10 | 0.001  | 6.8225  | 12.6217 |
| 0.2     | 10 | 0.001  | 7.3789  | 12.8850 |
| 0.0     | 10 | 0.0001 | 83.8786 | 85.7206 |
| 0.0     | 10 | 0.01   | 6.7542  | 13.9754 |
| 0.0     | 15 | 0.001  | 6.3000  | 13.8625 |
| 0.0     | 20 | 0.001  | 5.6592  | 14.0624 |
| split-3 |    |        |         |         |
| 0.0     | 10 | 0.001  | 6.5698  | 11.3338 |
| 0.1     | 10 | 0.001  | 7.2143  | 11.1366 |
| 0.2     | 10 | 0.001  | 7.3890  | 12.7779 |
| 0.0     | 10 | 0.0001 | 85.0719 | 84.0886 |
| 0.0     | 10 | 0.01   | 9.3281  | 15.0218 |
| 0.0     | 15 | 0.001  | 6.2271  | 11.2415 |
| 0.0     | 20 | 0.001  | 6.0448  | 10.5989 |

<sup>a</sup>The values shown in red color and the highlighted rows respectively represent the best hyperparameter and optimal combination of the hyperparameters.

From Table S43, the optimal set of hyperparameters are: dropout\_rate=0.0, learning rate=0.001, and number of epochs=15 (average of 3 runs). It is same as the hyperparameters obtained using a single train-validation split, shown in Table S36. The hyperparameters were chosen based on the balance between the train and validation losses.

### 13. Performance comparison for reactions 2 and 3

To compare the performance of reaction-2 with previously reported benchmarks, we considered 10 different 600:475 train-test splits. The results are reported in terms of mean absolute error (MAE in  $(\Delta G_R^\ddagger - \Delta G_S^\ddagger)$ ). In the case of reaction-2, the support vector machine (SVM) gave a MAE of  $0.1516 \pm 0.0050$  kcal/mol (ref. 19a). With the structure-based multiple fingerprint features (MFF) as an alternative representation, provided a MAE of 0.144 kcal/mol (ref. 12a). With our ULMFiT model, we could obtain a MAE of  $0.1554 \pm 0.0032$  kcal/mol. The results with **TL-m1'** model are shown in Table S45.

**Table S45.** Test and Train MAEs for the Training of Target-task Regressor for Reaction-2

| sr. no.<br>for runs | train_MAE     | test_MAE      | test_R <sup>2</sup> |
|---------------------|---------------|---------------|---------------------|
| 1                   | 0.1539        | 0.1575        | 0.8736              |
| 2                   | 0.1820        | 0.1513        | 0.8887              |
| 3                   | 0.1694        | 0.1580        | 0.8715              |
| 4                   | 0.1859        | 0.1546        | 0.8841              |
| 5                   | 0.1375        | 0.1563        | 0.8831              |
| 6                   | 0.1585        | 0.1569        | 0.8925              |
| 7                   | 0.1341        | 0.1599        | 0.8798              |
| 8                   | 0.1549        | 0.1492        | 0.8904              |
| 9                   | 0.1679        | 0.1552        | 0.8805              |
| 10                  | 0.1729        | 0.1544        | 0.8723              |
| avg.                | 0.1618±0.0173 | 0.1554±0.0032 | 0.8817±0.0076       |

For the performance comparison of reaction-3 with the previous study, we used 100 different 80:20 train-test splits and could obtain an RMSE of 8.59±0.84 and 8.65±1.08 with **TL-m1'** and **TL-m2'** respectively. With **TL-m0**, we observed an inferior RMSE of 10.93±2.59. The reported RMSE for reaction-3 was 8.4±1.8 with the best performing RF algorithm built on quantum mechanically derived descriptors (ref. 20a).

**Table S46.** Test and Train RMSEs for the Training of Target-task Regressor Using all Three **TL-m** Models for Reaction-3

| <b>TL-m2'</b> |           | <b>TL-m1'</b> |           | <b>TL-m0</b> |           |
|---------------|-----------|---------------|-----------|--------------|-----------|
| train RMSE    | test RMSE | train RMSE    | test RMSE | train RMSE   | test RMSE |
| 6.3596        | 7.7427    | 6.8491        | 7.7064    | 7.0852       | 8.7503    |
| 6.5294        | 9.1513    | 6.4895        | 8.3939    | 8.1773       | 10.1939   |
| 6.1404        | 8.3619    | 6.3862        | 9.126     | 9.0842       | 11.3878   |
| 6.3759        | 7.5982    | 6.5717        | 9.5639    | 7.2995       | 8.7129    |
| 6.2062        | 9.1337    | 6.7032        | 9.1481    | 7.2375       | 8.187     |
| 6.6893        | 7.0062    | 6.9175        | 8.0387    | 8.0346       | 9.3059    |
| 6.1535        | 8.8577    | 6.2992        | 8.6238    | 7.0534       | 9.4151    |
| 5.9580        | 9.5976    | 6.2202        | 9.6162    | 11.5595      | 16.2376   |
| 6.5224        | 9.0893    | 6.2558        | 9.4318    | 6.9502       | 10.0745   |
| 6.4311        | 11.2201   | 6.5286        | 9.6631    | 6.7083       | 10.9778   |
| 6.4355        | 7.0218    | 6.5722        | 7.8295    | 9.9927       | 11.5987   |
| 6.4314        | 12.2679   | 6.6748        | 8.8941    | 7.2373       | 9.4853    |
| 6.3260        | 6.5091    | 6.2180        | 7.6777    | 6.8573       | 8.0023    |
| 6.7349        | 7.8849    | 6.6193        | 8.4714    | 7.2625       | 7.963     |
| 6.1890        | 6.516     | 6.3976        | 7.5734    | 6.9548       | 10.4554   |

|        |         |        |         |         |         |
|--------|---------|--------|---------|---------|---------|
| 6.0877 | 9.2581  | 6.2552 | 9.4454  | 13.5728 | 16.7806 |
| 6.2251 | 9.9842  | 6.8797 | 9.3362  | 6.9862  | 9.7504  |
| 5.9650 | 9.4336  | 6.0561 | 9.1331  | 6.7675  | 10.4718 |
| 6.3416 | 9.9962  | 6.4241 | 11.6486 | 7.6271  | 10.9206 |
| 6.3507 | 8.5881  | 6.3522 | 8.023   | 9.5326  | 10.374  |
| 6.3001 | 7.9807  | 6.5690 | 8.251   | 6.8896  | 7.0424  |
| 6.4468 | 8.1955  | 6.7614 | 8.1124  | 7.1637  | 9.575   |
| 6.6906 | 9.4829  | 6.7647 | 9.8871  | 7.5059  | 9.2801  |
| 6.2544 | 8.9914  | 6.4846 | 8.4161  | 14.1811 | 14.5375 |
| 6.1977 | 9.0554  | 6.2578 | 9.4451  | 8.9318  | 11.0381 |
| 6.2862 | 8.2909  | 6.3901 | 7.7841  | 7.1652  | 7.6883  |
| 5.8617 | 9.2846  | 6.0491 | 9.119   | 6.6742  | 10.6165 |
| 6.2013 | 10.3585 | 6.3293 | 9.5902  | 7.0158  | 9.2255  |
| 6.1308 | 9.0587  | 6.3411 | 8.0687  | 13.6967 | 15.289  |
| 6.2158 | 11.0236 | 6.2269 | 9.285   | 8.4542  | 12.6772 |
| 6.7829 | 8.8889  | 7.1115 | 8.8663  | 11.4690 | 11.4645 |
| 6.1312 | 8.0224  | 6.4180 | 8.5354  | 11.0476 | 13.9708 |
| 6.7353 | 7.3326  | 6.8768 | 7.4632  | 7.1910  | 8.0613  |
| 6.5127 | 8.4573  | 6.5973 | 8.8352  | 9.2854  | 13.3683 |
| 6.3853 | 6.6789  | 6.6152 | 6.6183  | 12.6572 | 12.6163 |
| 6.2391 | 9.1461  | 6.5462 | 8.2436  | 7.3167  | 7.9583  |
| 5.8672 | 9.8927  | 6.2908 | 8.8918  | 13.9086 | 18.385  |
| 6.0173 | 7.9722  | 5.9652 | 8.2694  | 10.7509 | 10.6515 |
| 6.4434 | 9.2192  | 6.8351 | 8.4501  | 9.2224  | 10.5109 |
| 6.2421 | 8.0979  | 6.2992 | 8.2141  | 9.0252  | 11.5402 |
| 6.3599 | 8.7662  | 6.5050 | 8.1053  | 7.2776  | 8.8161  |
| 6.5503 | 6.5044  | 6.8114 | 7.2577  | 7.5576  | 8.1345  |
| 6.2893 | 9.4336  | 6.7561 | 10.0375 | 12.1090 | 15.622  |
| 6.2996 | 8.8133  | 6.4655 | 9.1437  | 7.3000  | 10.474  |
| 6.3114 | 8.5949  | 6.5654 | 8.6896  | 10.0342 | 12.0128 |
| 6.5639 | 10.2249 | 6.4797 | 10.6181 | 6.9237  | 10.9979 |
| 6.2443 | 7.8957  | 6.5294 | 8.013   | 9.4408  | 9.5573  |
| 5.8243 | 9.41    | 6.2933 | 9.5422  | 11.1334 | 12.2715 |
| 6.2066 | 8.9565  | 6.3285 | 8.8115  | 11.4307 | 12.7895 |
| 6.2711 | 7.6598  | 6.6107 | 8.0159  | 7.1710  | 9.135   |
| 6.2893 | 8.3606  | 6.5014 | 8.7875  | 9.4482  | 12.1648 |
| 6.0384 | 8.7015  | 6.1145 | 8.8447  | 9.1486  | 13.096  |
| 6.5600 | 8.9695  | 6.6905 | 9.3179  | 7.3386  | 9.6563  |
| 5.9977 | 8.9577  | 6.2510 | 9.7344  | 6.8937  | 9.3246  |
| 6.8244 | 8.2881  | 6.7104 | 9.2268  | 7.3475  | 9.04    |
| 7.4259 | 8.8708  | 6.8110 | 8.3893  | 7.6127  | 8.5317  |
| 6.4111 | 9.4384  | 6.4590 | 9.2353  | 11.7456 | 18.5653 |
| 6.0471 | 9.304   | 6.1417 | 8.5678  | 8.9360  | 13.8737 |
| 6.3961 | 9.9917  | 6.5433 | 9.2185  | 9.1878  | 10.3704 |
| 6.3638 | 7.4356  | 6.3992 | 8.5118  | 7.5263  | 8.771   |

|           |           |           |           |           |            |
|-----------|-----------|-----------|-----------|-----------|------------|
| 6.1355    | 7.7803    | 6.3514    | 8.7419    | 9.7149    | 12.6023    |
| 6.0951    | 9.6213    | 6.5581    | 8.821     | 6.9828    | 8.7979     |
| 6.1106    | 8.7533    | 6.3890    | 8.6234    | 8.5163    | 14.3999    |
| 6.7023    | 8.5787    | 6.6716    | 8.1387    | 10.1176   | 11.7949    |
| 7.2177    | 9.1929    | 7.4639    | 8.4834    | 7.4836    | 9.0815     |
| 6.1682    | 9.0405    | 6.2492    | 8.688     | 6.7740    | 9.3034     |
| 6.4346    | 9.116     | 6.7505    | 9.1196    | 9.8552    | 11.3242    |
| 5.8264    | 10.0693   | 6.0451    | 9.3965    | 7.7437    | 10.6695    |
| 6.1219    | 7.8109    | 6.1169    | 7.8599    | 7.0236    | 9.97       |
| 6.4763    | 8.2535    | 6.5209    | 8.3271    | 8.0939    | 10.4769    |
| 6.8043    | 7.9624    | 7.0347    | 8.8768    | 8.0869    | 8.7809     |
| 6.2386    | 7.4138    | 6.5720    | 8.1629    | 7.7248    | 10.2693    |
| 7.0117    | 6.6545    | 7.0586    | 7.4466    | 11.1873   | 11.1965    |
| 6.3469    | 7.8556    | 6.6646    | 8.5469    | 7.1573    | 9.6236     |
| 6.3745    | 7.5514    | 6.4412    | 7.4115    | 13.2380   | 12.1121    |
| 6.1974    | 8.7832    | 6.4485    | 8.589     | 6.8861    | 9.0687     |
| 6.7206    | 7.6666    | 6.7989    | 6.9552    | 8.9228    | 10.617     |
| 6.4144    | 9.4531    | 6.5601    | 9.002     | 8.4073    | 9.6566     |
| 5.9893    | 10.0519   | 6.2179    | 8.895     | 7.0711    | 9.395      |
| 6.5541    | 7.2539    | 6.5892    | 7.6875    | 10.7602   | 13.6493    |
| 6.4159    | 8.3686    | 6.4218    | 7.8765    | 7.1064    | 7.7455     |
| 6.6771    | 7.3394    | 6.8865    | 7.7212    | 8.3441    | 9.8032     |
| 6.1469    | 8.6303    | 6.0920    | 7.5235    | 8.7299    | 12.024     |
| 6.4885    | 9.4807    | 6.6381    | 9.774     | 8.2087    | 9.72       |
| 6.3740    | 10.1924   | 6.4796    | 8.5694    | 7.0798    | 9.3893     |
| 6.7281    | 7.7974    | 6.9298    | 8.2473    | 10.5142   | 12.8748    |
| 6.0307    | 8.9875    | 6.5101    | 9.7896    | 6.5277    | 10.2947    |
| 6.3017    | 10.2741   | 6.6333    | 8.9043    | 7.0904    | 9.0501     |
| 6.6943    | 8.1125    | 6.9829    | 8.8701    | 7.5867    | 8.9449     |
| 6.6132    | 9.009     | 6.6996    | 8.6349    | 8.7305    | 10.0797    |
| 6.2134    | 7.0091    | 6.3858    | 6.6895    | 14.4157   | 14.379     |
| 6.0161    | 8.9351    | 6.2919    | 8.3468    | 12.1007   | 11.4311    |
| 6.4177    | 8.8755    | 6.5545    | 7.9828    | 7.6130    | 6.6777     |
| 5.9743    | 9.436     | 6.2408    | 8.6589    | 9.2285    | 16.1012    |
| 6.4007    | 7.355     | 6.5467    | 7.0128    | 7.3436    | 7.6384     |
| 6.4702    | 7.8351    | 6.7397    | 8.3495    | 11.2627   | 12.5806    |
| 6.2450    | 9.9494    | 6.3340    | 9.1437    | 10.4340   | 11.0897    |
| 6.4797    | 7.3515    | 6.7329    | 8.2351    | 7.5552    | 9.0015     |
| 6.1716    | 7.9234    | 6.2203    | 6.3909    | 11.9151   | 21.0517    |
| 6.6354    | 8.5171    | 6.6917    | 8.8732    | 12.3987   | 12.7537    |
| 6.35±0.28 | 8.65±1.08 | 6.52±0.26 | 8.59±0.84 | 8.83±2.06 | 10.93±2.59 |



## 14. Out-of-sample predictions for reactions 1 and 2

The model generalizability is evaluated on non-random splits similar to that employed in the previous studies. For reaction-1, the isoxazole additives were split into four different training and test sets (ref. 19).<sup>9</sup> For reaction-2, the data was divided into one common training set and three different test sets for (i) substrates, (ii) catalysts, (iii) both substrates-catalysts (refs. 19 and 33).

We have used the same out-of-samples splits for prediction using our language model (**TL-m1**).

The comparison of results for reactions 1 and 2 is provided in Tables S47 and S48.

**Table S47.** Performance Comparison on Out-of-Sample Splits for Reaction 1

| R <sup>2</sup> | additive test 1 | additive test 2 | additive test 3 | additive test 4 |
|----------------|-----------------|-----------------|-----------------|-----------------|
| Doyle          | 0.80            | 0.77            | 0.64            | 0.54            |
| One-hot        | 0.69            | 0.67            | 0.49            | 0.49            |
| MFF            | 0.85            | 0.71            | 0.64            | 0.18            |
| ULMFiT         | 0.81            | 0.81            | 0.68            | 0.28            |

**Table S48.** Performance Comparison on Out-of-Sample Splits for Reaction 2

| MAE (kcal/mol) | substrate test | catalyst test | catalyst-substrate test |
|----------------|----------------|---------------|-------------------------|
| Denmark        | 0.161          | 0.211         | 0.238                   |
| One-hot        | 0.178          | 0.447         | 0.507                   |
| MFF            | 0.137          | 0.254         | 0.282                   |
| ULMFiT         | 0.151          | 0.256         | 0.276                   |

## 15. Comparison of model using paired t-test

The paired t-test is performed to analyze the same set of observations performed under different conditions to find out if the mean of the difference between paired samples is statistically significant. Here, we have used paired t-test to analyze different TL models for all three reactions. The hypothesis for paired t-test is as follows:

Null hypothesis  $H_0$ : mean\_difference=0

Alternate hypothesis  $H_1$ : mean\_difference $\neq$ 0

with a 95% confidence interval and significance level ( $\alpha$ ) of 0.05. The p-value is compared to  $\alpha$  to determine if the difference in means is significant.

If  $p\text{-value} \leq \alpha$ , difference between means is statistically significant.

If  $p\text{-value} > \alpha$ , difference between means is not statistically significant.

The comparison of p-values for various models for all three reactions is provided in Table S49.

**TL-m** denotes the fine-tuning without gradual unfreezing and **TL-m'** denotes the fine-tuning with gradual unfreezing.

**Table S49.** p-values as Obtained from Paired t-Test for All Three Reactions

| Sr. no. | Models                          | Reaction-1 | Reaction-2 | Reaction-3 |
|---------|---------------------------------|------------|------------|------------|
| 1       | <b>TL-m1</b> and <b>TL-m1'</b>  | 0.000      | 0.135      | 0.216      |
| 2       | <b>TL-m2</b> and <b>TL-m2'</b>  | 0.000      | 0.007      | 0.674      |
| 3       | <b>TL-m1</b> and <b>TL-m2</b>   | 0.000      | 0.712      | 0.239      |
| 4       | <b>TL-m1'</b> and <b>TL-m2'</b> | 0.000      | 0.074      | 0.773      |
| 5       | <b>TL-m1</b> and <b>TL-m0</b>   | 0.000      | 0.000      | 0.000      |
| 6       | <b>TL-m2</b> and <b>TL-m0</b>   | 0.000      | 0.000      | 0.000      |

It can be noticed from **Table S49** that for all three reactions, the model with TL is significantly different than the one without TL (rows 5 and 6). For reactions 2 and 3, no significant difference is observed either with fine-tuning or gradual unfreezing (rows 1-4).

## 16. References

- 
- (1) Merity, S., Keskar, N. S. & Socher, R. Regularizing and optimizing LSTM language models. *arXiv preprint arXiv:1708.02182v1* (2017).
  - (2) Gulordava, K. et al. Colorless green recurrent networks dream hierarchically. *arXiv preprint arXiv:1803.11138* (2018).
  - (3) (a) Gaulton, A. et al. ChEMBL: a large-scale bioactivity database for drug discovery. *Nuc. acids res.* **40**, D1100-D1107 (2011). (b) The already curated one million SMILES were taken

---

from <https://doi.org/10.1186/s13321-020-00430-x> for training the general-domain LM.

- (4) Smith, L. N. A disciplined approach to neural network hyper-parameters: Part 1-learning rate, batch size, momentum, and weight decay, *arXiv preprint arXiv:1803.09820* (2018).
- (5) Kimber, T. B., Engelke, S., Tetko, I. V., Bruno, E. & Godin, G. Synergy effect between convolutional neural networks and the multiplicity of smiles for improvement of molecular prediction. *arXiv preprint arXiv:1812.04439* (2018).
- (6) O'Boyle, N. M. Towards a universal SMILES representation-a standard method to generate canonical SMILES based on the InChI. *J Cheminform.* **4**, 22 (2012).
- (7) Adam, P. et al. Automatic differentiation in PyTorch. In: 31<sup>st</sup> Conf *Neural Inf Process Syst.* (2017).
- (8) Howard, J. & Gugger, S. Fastai: a layered API for deep learning. *Information.* **11**, 108 (2020).
- (9) Estrada, J. G., Ahneman, D. T., Sheridan, R. P., Dreher, S. D. & Doyle, A.G. Response to comment on “Predicting reaction performance in C–N cross-coupling using machine learning”. *Science* **362**, eaat8763 (2018).
